# Supplementary material for: Sexual dimorphism in obesity is governed by RELMα regulation of adipose macrophages and eosinophils
Source: eLife. 2023 May 10;12:e86001. doi: 10.7554/eLife.86001 (PMC10171862; doi:10.7554/eLife.86001)
Supplement: Supplementary file 2. [file elife-86001-supp2.xlsx]

## Sheet: Supplement File 1
Fig 5: All GO enriched terms for the top 30 upregulated genes .
Data are from 1 experiment with 3 mice per group.
WT Female v WT Male: Over-represented pathways in WT Female
Enrichment FDR	nGenes	Pathway Genes	Fold Enrichment	Pathway	Genes
0.00031882	12	1517	5.96959	Positive regulation of multicellular organismal process	Ramp2 Abca1 Lpl Ebf2 Il4ra Casp4 Spon2 Icam1 Gja1 Ntrk2 Cxcl12 Zbtb16
0.00117085	11	1546	5.36947	Defense response	Adamts4 Lpl Cxcl16 Aoc3 Clec2d Il4ra Casp4 Spon2 Icam1 Gja1 Cxcl12
0.00117085	11	1524	5.44699	Biological process involved in interspecies interaction between organisms	Adamts4 Abca1 Lpl Cxcl16 Clec2d Il4ra Casp4 Spon2 Icam1 Gja1 Cxcl12
0.00210053	11	1798	4.61691	Response to oxygen-containing compound	Ramp2 Abca1 Lpl Cxcl16 Casp4 Spon2 Icam1 Gja1 Ntrk2 Cxcl12 Adh1
0.00210053	10	1439	5.2443	Response to biotic stimulus	Adamts4 Abca1 Lpl Cxcl16 Clec2d Il4ra Casp4 Spon2 Gja1 Cxcl12
0.00210053	9	1140	5.9578	Positive regulation of gene expression	Ramp2 Lpl Il4ra Casp4 Spon2 Spon1 Gja1 Ntrk2 Maf
0.00210053	10	1403	5.37887	Response to external biotic stimulus	Adamts4 Abca1 Lpl Cxcl16 Clec2d Il4ra Casp4 Spon2 Gja1 Cxcl12
0.00210053	10	1400	5.39039	Response to other organism	Adamts4 Abca1 Lpl Cxcl16 Clec2d Il4ra Casp4 Spon2 Gja1 Cxcl12
0.00254774	3	36	62.8879	Cellular response to amyloid-beta	Casp4 Icam1 Gja1
0.00379949	3	43	52.6504	Response to amyloid-beta	Casp4 Icam1 Gja1
0.00379949	8	967	6.24327	Response to lipid	Ramp2 Abca1 Lpl Cxcl16 Spon2 Gja1 Ntrk2 Adh1
0.00570713	9	1362	4.98671	Cell adhesion	Aoc3 Il4ra Antxr1 Spon2 Icam1 Spon1 Sned1 Cxcl12 Zbtb16
0.00570713	9	1374	4.94316	Biological adhesion	Aoc3 Il4ra Antxr1 Spon2 Icam1 Spon1 Sned1 Cxcl12 Zbtb16
0.00768366	3	60	37.7328	T cell migration	Cxcl16 Icam1 Cxcl12
0.00943369	4	180	16.7701	Neuron migration	Igsf10 Gja1 Ntrk2 Cxcl12
0.0133677	8	1229	4.91232	Cellular response to oxygen-containing compound	Abca1 Lpl Cxcl16 Casp4 Spon2 Icam1 Gja1 Ntrk2
0.0133677	7	903	5.85004	Positive regulation of cell differentiation	Ramp2 Lpl Il4ra Gja1 Ntrk2 Cxcl12 Zbtb16
0.014053	9	1610	4.21857	Regulation of cell differentiation	Ramp2 Lpl Clec2d Il4ra Gja1 Ntrk2 Maf Cxcl12 Zbtb16
0.0159817	3	85	26.6349	Positive regulation of cold-induced thermogenesis	Ebf2 Il4ra Gja1
0.0205455	2	19	79.4374	Positive regulation of myoblast fusion	Il4ra Cxcl12
0.0205455	2	19	79.4374	Negative regulation of amyloid-beta formation	Spon1 Ntrk2
0.0205455	6	698	6.48701	Inflammatory response	Lpl Aoc3 Il4ra Casp4 Icam1 Gja1
0.0219619	2	22	68.605	Regulation of myoblast fusion	Il4ra Cxcl12
0.0219619	2	22	68.605	Negative regulation of amyloid precursor protein catabolic process	Spon1 Ntrk2
0.0219619	8	1405	4.29697	Regulation of multicellular organismal development	Ramp2 Clec2d Il4ra Gja1 Ntrk2 Maf Cxcl12 Zbtb16
0.0219619	6	745	6.07776	Response to bacterium	Adamts4 Abca1 Lpl Cxcl16 Spon2 Gja1
0.0219619	3	108	20.9626	Response to retinoic acid	Abca1 Gja1 Adh1
0.0219619	3	106	21.3582	Lymphocyte migration	Cxcl16 Icam1 Cxcl12
0.0229846	2	23	65.6222	T cell chemotaxis	Cxcl16 Cxcl12
0.0238209	5	498	7.57686	T cell activation	Il4ra Icam1 Gja1 Cxcl12 Zbtb16
0.0279306	5	523	7.21468	Response to peptide	Lpl Casp4 Icam1 Gja1 Cxcl12
0.0279306	2	27	55.9004	Regulation of leukocyte adhesion to vascular endothelial cell	Icam1 Cxcl12
0.0279306	2	27	55.9004	Positive regulation of syncytium formation by plasma membrane fusion	Il4ra Cxcl12
0.0282905	6	818	5.53537	Positive regulation of immune system process	Aoc3 Il4ra Spon2 Icam1 Cxcl12 Zbtb16
0.0284351	3	131	17.2822	Cold-induced thermogenesis	Ebf2 Il4ra Gja1
0.0284351	3	131	17.2822	Regulation of cold-induced thermogenesis	Ebf2 Il4ra Gja1
0.0284351	4	301	10.0286	Regulation of leukocyte cell-cell adhesion	Il4ra Icam1 Cxcl12 Zbtb16
0.0284351	2	29	52.0452	Negative regulation of endothelial cell apoptotic process	Ramp2 Icam1
0.028487	5	549	6.873	Regulation of defense response	Lpl Aoc3 Clec2d Casp4 Gja1
0.028487	2	30	50.3103	Regulation of syncytium formation by plasma membrane fusion	Il4ra Cxcl12
0.0289777	2	31	48.6874	Glutamate secretion	Gja1 Ntrk2
0.0289777	2	31	48.6874	Response to fluid shear stress	Abca1 Gja1
0.0309843	3	145	15.6136	Adaptive thermogenesis	Ebf2 Il4ra Gja1
0.0309843	8	1619	3.72899	Immune response	Adamts4 Cxcl16 Clec2d Il4ra Casp4 Spon2 Icam1 Cxcl12
0.0309843	4	337	8.95733	Leukocyte cell-cell adhesion	Il4ra Icam1 Cxcl12 Zbtb16
0.0309843	8	1606	3.75918	Response to endogenous stimulus	Ramp2 Lpl Casp4 Icam1 Gja1 Ntrk2 Cxcl12 Adh1
0.0309843	6	905	5.00324	Response to hormone	Ramp2 Lpl Gja1 Ntrk2 Cxcl12 Adh1
0.0309843	6	876	5.16887	Regulation of response to external stimulus	Lpl Aoc3 Clec2d Casp4 Gja1 Cxcl12
0.0309843	4	342	8.82638	Leukocyte mediated immunity	Clec2d Il4ra Spon2 Icam1
0.0309843	3	147	15.4011	Positive regulation of leukocyte migration	Aoc3 Icam1 Cxcl12
0.0309843	2	34	44.3915	Regulation of cellular extravasation	Icam1 Cxcl12
0.0309843	5	592	6.37378	Cellular response to lipid	Abca1 Lpl Cxcl16 Spon2 Ntrk2
0.0309843	2	36	41.9253	Plasma lipoprotein particle organization	Abca1 Lpl
0.0325337	6	918	4.93239	Regulation of cell migration	Cxcl16 Aoc3 Igsf10 Icam1 Gja1 Cxcl12
0.0326687	6	922	4.91099	Response to cytokine	Abca1 Cxcl16 Il4ra Casp4 Icam1 Cxcl12
0.0326687	2	38	39.7187	Regulation of amyloid-beta formation	Spon1 Ntrk2
0.0328829	4	356	8.47927	Leukocyte migration	Cxcl16 Aoc3 Icam1 Cxcl12
0.0339068	4	363	8.31576	Cellular response to peptide	Lpl Casp4 Icam1 Gja1
0.0339068	4	364	8.29291	Response to lipopolysaccharide	Abca1 Cxcl16 Spon2 Gja1
0.0339068	2	40	37.7328	Protein-lipid complex subunit organization	Abca1 Lpl
0.0354545	5	637	5.92351	Cellular response to organonitrogen compound	Lpl Casp4 Icam1 Gja1 Ntrk2
0.0354563	6	970	4.66797	Regulation of cell motility	Cxcl16 Aoc3 Igsf10 Icam1 Gja1 Cxcl12
0.0354563	3	173	13.0865	Temperature homeostasis	Ebf2 Il4ra Gja1
0.0354563	4	380	7.94374	Response to molecule of bacterial origin	Abca1 Cxcl16 Spon2 Gja1
0.0354563	7	1330	3.97187	Regulation of immune system process	Aoc3 Clec2d Il4ra Spon2 Icam1 Cxcl12 Zbtb16
0.0354563	2	43	35.1002	Leukocyte adhesion to vascular endothelial cell	Icam1 Cxcl12
0.0354563	3	172	13.1626	Mononuclear cell migration	Cxcl16 Icam1 Cxcl12
0.0354563	2	43	35.1002	Extracellular matrix assembly	Ramp2 Antxr1
0.0355032	2	44	34.3025	Positive regulation of alpha-beta T cell differentiation	Il4ra Zbtb16
0.0365937	2	45	33.5402	Positive regulation of vasoconstriction	Icam1 Gja1
0.0367308	1	2	377.328	Epicardial cell to mesenchymal cell transition	Gja1
0.0367308	6	1012	4.47424	Defense response to other organism	Adamts4 Cxcl16 Clec2d Il4ra Casp4 Spon2
0.0367308	1	2	377.328	Trans-synaptic signaling by neuropeptide, modulating synaptic transmission	Ntrk2
0.0367308	2	56	26.952	Export across plasma membrane	Abca1 Gja1
0.0367308	4	400	7.54655	Visual system development	Gja1 Ntrk2 Maf Mfap2
0.0367308	5	704	5.35977	Cellular response to nitrogen compound	Lpl Casp4 Icam1 Gja1 Ntrk2
0.0367308	1	2	377.328	Negative regulation of primary amine oxidase activity	Aoc3
0.0367308	2	46	32.8111	Regulation of amyloid precursor protein catabolic process	Spon1 Ntrk2
0.0367308	2	50	30.1862	Negative regulation of epithelial cell apoptotic process	Ramp2 Icam1
0.0367308	1	2	377.328	Positive regulation of mesodermal cell differentiation	Gja1
0.0367308	1	2	377.328	Response to ultrasound	Cxcl12
0.0367308	2	52	29.0252	Regulation of endothelial cell apoptotic process	Ramp2 Icam1
0.0367308	4	427	7.06937	Calcium ion transport	Ramp2 Icam1 Gja1 Cxcl12
0.0367308	2	49	30.8023	Myoblast fusion	Il4ra Cxcl12
0.0367308	5	717	5.26259	Blood vessel development	Ramp2 Antxr1 Gja1 Ntrk2 Cxcl12
0.0367308	5	716	5.26994	Behavior	Aoc3 Gja1 Ntrk2 Cxcl12 Adh1
0.0367308	3	203	11.1525	Regulation of blood pressure	Ramp2 Aoc3 Gja1
0.0367308	4	397	7.60358	Eye development	Gja1 Ntrk2 Maf Mfap2
0.0367308	6	1084	4.17706	Response to organonitrogen compound	Lpl Casp4 Icam1 Gja1 Ntrk2 Cxcl12
0.0367308	1	2	377.328	Regulation of cell communication by chemical coupling	Gja1
0.0367308	1	2	377.328	Positive regulation of cell communication by chemical coupling	Gja1
0.0367308	7	1474	3.58384	Cell migration	Cxcl16 Aoc3 Igsf10 Icam1 Gja1 Ntrk2 Cxcl12
0.0367308	4	414	7.29135	Regulation of cell-cell adhesion	Il4ra Icam1 Cxcl12 Zbtb16
0.0367308	2	52	29.0252	Regulation of chondrocyte differentiation	Maf Zbtb16
0.0367308	2	56	26.952	Positive regulation of interleukin-1 beta production	Lpl Casp4
0.0367308	2	46	32.8111	Amyloid-beta formation	Spon1 Ntrk2
0.0367308	4	430	7.02005	Cell junction assembly	Ramp2 Lgi2 Gja1 Ntrk2
0.0367308	6	1019	4.4435	Regulation of locomotion	Cxcl16 Aoc3 Igsf10 Icam1 Gja1 Cxcl12
0.0367308	2	52	29.0252	Mast cell mediated immunity	Il4ra Spon2
0.0367308	4	435	6.93936	Positive regulation of MAPK cascade	Icam1 Alkal2 Ntrk2 Cxcl12
0.0367308	1	2	377.328	Negative regulation of T-helper 1 cell differentiation	Il4ra
0.0367308	4	419	7.20435	Positive regulation of cell adhesion	Il4ra Icam1 Cxcl12 Zbtb16
0.0367308	5	706	5.34458	Lymphocyte activation	Il4ra Icam1 Gja1 Cxcl12 Zbtb16
0.0367308	2	56	26.952	Lymphocyte chemotaxis	Cxcl16 Cxcl12
0.0367308	4	405	7.45338	Sensory system development	Gja1 Ntrk2 Maf Mfap2
0.0367308	2	55	27.442	Amyloid-beta metabolic process	Spon1 Ntrk2
0.0367308	7	1380	3.82796	Positive regulation of developmental process	Ramp2 Lpl Il4ra Gja1 Ntrk2 Cxcl12 Zbtb16
0.0367308	3	194	11.6699	Positive regulation of binding	Ramp2 Ebf2 Spon1
0.0367308	6	1058	4.27971	Regulation of cellular component movement	Cxcl16 Aoc3 Igsf10 Icam1 Gja1 Cxcl12
0.0367308	3	204	11.0979	Vascular process in circulatory system	Ramp2 Icam1 Gja1
0.0367308	1	2	377.328	Positive regulation of ERK5 cascade	Alkal2
0.0367308	2	55	27.442	Endothelial cell apoptotic process	Ramp2 Icam1
0.0367308	1	2	377.328	Positive regulation of high-density lipoprotein particle assembly	Abca1
0.0367308	1	2	377.328	Atrial ventricular junction remodeling	Gja1
0.0373888	3	212	10.6791	Regulation of leukocyte migration	Aoc3 Icam1 Cxcl12
0.0374506	5	747	5.05124	Vasculature development	Ramp2 Antxr1 Gja1 Ntrk2 Cxcl12
0.0377377	3	214	10.5793	Positive regulation of leukocyte cell-cell adhesion	Il4ra Icam1 Zbtb16
0.0383371	2	60	25.1552	Amyloid precursor protein catabolic process	Spon1 Ntrk2
0.0385363	4	455	6.63433	Positive regulation of cytokine production	Lpl Il4ra Casp4 Spon2
0.0386222	2	61	24.7428	Regulation of alpha-beta T cell differentiation	Il4ra Zbtb16
0.0386222	6	1112	4.07188	Positive regulation of cellular component organization	Abca1 Il4ra Icam1 Alkal2 Ntrk2 Cxcl12
0.0386284	3	219	10.3377	Positive regulation of ERK1 and ERK2 cascade	Icam1 Alkal2 Cxcl12
0.0389002	2	63	23.9573	Regulation of plasma lipoprotein particle levels	Abca1 Lpl
0.0389002	2	63	23.9573	Cell-cell fusion	Il4ra Cxcl12
0.0389002	2	63	23.9573	Syncytium formation by plasma membrane fusion	Il4ra Cxcl12
0.0389002	7	1517	3.48226	Regulation of apoptotic process	Ramp2 Casp4 Icam1 Gja1 Ntrk2 Cxcl12 Zbtb16
0.0389002	2	62	24.3437	Positive regulation of alpha-beta T cell activation	Il4ra Zbtb16
0.0389002	3	222	10.198	Cellular response to lipopolysaccharide	Abca1 Cxcl16 Spon2
0.0404159	3	227	9.97342	Regeneration	Igsf10 Gja1 Cxcl12
0.0407257	2	65	23.2202	Syncytium formation	Il4ra Cxcl12
0.0407925	3	229	9.88631	Cellular response to molecule of bacterial origin	Abca1 Cxcl16 Spon2
0.0410114	2	67	22.527	Positive regulation of chemokine production	Lpl Il4ra
0.0410114	2	67	22.527	Positive regulation of interleukin-1 production	Lpl Casp4
0.0410114	2	66	22.8683	Embryonic digit morphogenesis	Gja1 Zbtb16
0.0410114	7	1552	3.40373	Regulation of programmed cell death	Ramp2 Casp4 Icam1 Gja1 Ntrk2 Cxcl12 Zbtb16
0.0410114	2	67	22.527	Cellular extravasation	Icam1 Cxcl12
0.0410114	2	67	22.527	Positive regulation of fat cell differentiation	Lpl Zbtb16
0.0412491	1	3	251.552	Trans-synaptic signaling by neuropeptide	Ntrk2
0.0412491	1	3	251.552	Acetaldehyde metabolic process	Adh1
0.0412491	1	3	251.552	Negative regulation of leukocyte tethering or rolling	Cxcl12
0.0412491	4	488	6.1857	Blood circulation	Ramp2 Aoc3 Icam1 Gja1
0.0412491	1	3	251.552	Cell communication by chemical coupling	Gja1
0.0412491	2	68	22.1957	Acidic amino acid transport	Gja1 Ntrk2
0.0412491	1	3	251.552	Chylomicron remodeling	Lpl
0.0412491	7	1587	3.32866	Positive regulation of molecular function	Ramp2 Ebf2 Antxr1 Icam1 Spon1 Alkal2 Ntrk2
0.0412491	3	243	9.31673	Fat cell differentiation	Lpl Ebf2 Zbtb16
0.0412491	1	3	251.552	Lipoprotein particle mediated signaling	Lpl
0.0412491	1	3	251.552	Low-density lipoprotein particle mediated signaling	Lpl
0.0412491	2	71	21.2579	Regulation of cartilage development	Maf Zbtb16
0.0412491	1	3	251.552	Regulation of ERK5 cascade	Alkal2
0.0412491	1	3	251.552	Positive regulation of glomerular filtration	Gja1
0.0412491	5	811	4.65262	Cellular response to cytokine stimulus	Abca1 Il4ra Casp4 Icam1 Cxcl12
0.0412491	1	3	251.552	Regulation of high-density lipoprotein particle assembly	Abca1
0.042314	6	1190	3.80498	Response to nitrogen compound	Lpl Casp4 Icam1 Gja1 Ntrk2 Cxcl12
0.0426181	3	247	9.16585	Positive regulation of defense response	Lpl Aoc3 Gja1
0.0435176	2	74	20.3961	Amyloid precursor protein metabolic process	Spon1 Ntrk2
0.0435176	3	250	9.05586	Lymphocyte mediated immunity	Clec2d Il4ra Icam1
0.0442804	3	253	8.94848	Positive regulation of cell-cell adhesion	Il4ra Icam1 Zbtb16
0.0442804	4	514	5.8728	Circulatory system process	Ramp2 Aoc3 Icam1 Gja1
0.0442804	3	253	8.94848	Cellular response to biotic stimulus	Abca1 Cxcl16 Spon2
0.0442804	6	1212	3.73592	Regulation of response to stress	Lpl Aoc3 Clec2d Casp4 Gja1 Cxcl12
0.0449687	2	77	19.6014	Regulation of vasoconstriction	Icam1 Gja1
0.0449687	7	1636	3.22896	Cell motility	Cxcl16 Aoc3 Igsf10 Icam1 Gja1 Ntrk2 Cxcl12
0.0449687	7	1636	3.22896	Localization of cell	Cxcl16 Aoc3 Igsf10 Icam1 Gja1 Ntrk2 Cxcl12
0.0472538	1	4	188.664	Trans-synaptic signaling by BDNF, modulating synaptic transmission	Ntrk2
0.0472538	1	4	188.664	Trans-synaptic signaling by BDNF	Ntrk2
0.0472538	1	4	188.664	Synaptic signaling via neuropeptide	Ntrk2
0.0472538	1	4	188.664	Negative regulation of leukocyte adhesion to vascular endothelial cell	Cxcl12
0.0472538	1	4	188.664	Adrenomedullin receptor signaling pathway	Ramp2
0.0472538	5	857	4.40289	Secretion by cell	Abca1 Il4ra Gja1 Ntrk2 Cxcl12
0.0472538	1	4	188.664	Chemokine (C-X-C motif) ligand 12 signaling pathway	Cxcl12
0.0472538	2	80	18.8664	Tissue regeneration	Igsf10 Gja1
0.0472538	2	82	18.4062	Cholesterol homeostasis	Abca1 Lpl
0.0472538	1	4	188.664	Induction of bacterial agglutination	Spon2
0.0472538	5	862	4.37735	Leukocyte activation	Il4ra Icam1 Gja1 Cxcl12 Zbtb16
0.0472538	1	4	188.664	Receptor-mediated virion attachment to host cell	Icam1
0.0472538	1	4	188.664	Positive regulation of NK T cell differentiation	Zbtb16
0.0473945	4	540	5.59004	Endocytosis	Ramp2 Abca1 Cxcl16 Spon2
0.0474173	2	83	18.1845	Sterol homeostasis	Abca1 Lpl
0.0474173	2	83	18.1845	Bicellular tight junction assembly	Ramp2 Gja1
0.0480685	4	549	5.4984	Positive regulation of cell migration	Cxcl16 Aoc3 Icam1 Cxcl12
0.0480685	2	85	17.7566	Interleukin-1 beta production	Lpl Casp4
0.0480685	2	85	17.7566	Lens development in camera-type eye	Gja1 Maf
0.0480685	2	85	17.7566	Regulation of interleukin-1 beta production	Lpl Casp4
0.0480685	3	273	8.29291	Regulation of calcium ion transport	Icam1 Gja1 Cxcl12
0.0480685	3	274	8.26265	Connective tissue development	Ebf2 Maf Zbtb16
0.0486967	2	86	17.5501	Tight junction assembly	Ramp2 Gja1
0.0486967	7	1704	3.10011	Regulation of cell death	Ramp2 Casp4 Icam1 Gja1 Ntrk2 Cxcl12 Zbtb16
0.0486967	4	553	5.45863	Signal release	Abca1 Gja1 Ntrk2 Cxcl12
0.0495176	2	91	16.5858	Tight junction organization	Ramp2 Gja1
0.0495176	5	905	4.16937	Export from cell	Abca1 Il4ra Gja1 Ntrk2 Cxcl12
0.0495176	3	288	7.86099	Regulation of leukocyte differentiation	Clec2d Il4ra Zbtb16
0.0495176	2	90	16.7701	Regulation of epithelial cell apoptotic process	Ramp2 Icam1
0.0495176	1	5	150.931	Epididymis development	Gja1
0.0495176	4	573	5.2681	Positive regulation of cell motility	Cxcl16 Aoc3 Icam1 Cxcl12
0.0495176	1	5	150.931	Positive regulation of glucocorticoid receptor signaling pathway	Ntrk2
0.0495176	1	5	150.931	Negative regulation of dendritic cell apoptotic process	Cxcl12
0.0495176	2	90	16.7701	Vasculogenesis	Ramp2 Ntrk2
0.0495176	1	5	150.931	Membrane to membrane docking	Icam1
0.0495176	3	286	7.91596	Extracellular matrix organization	Ramp2 Adamts4 Antxr1
0.0495176	2	92	16.4055	Chemokine production	Lpl Il4ra
0.0495176	2	91	16.5858	Regulation of chemokine production	Lpl Il4ra
0.0495176	4	558	5.40971	Immune effector process	Clec2d Il4ra Spon2 Icam1
0.0495176	1	5	150.931	Apolipoprotein A-I-mediated signaling pathway	Abca1
0.0495176	3	288	7.86099	Extracellular structure organization	Ramp2 Adamts4 Antxr1
0.0495176	2	92	16.4055	Apical junction assembly	Ramp2 Gja1
0.0495176	3	287	7.88838	External encapsulating structure organization	Ramp2 Adamts4 Antxr1
0.0495176	1	5	150.931	Male germ-line stem cell asymmetric division	Zbtb16
0.0495176	1	5	150.931	Negative regulation of T-helper 1 type immune response	Il4ra
0.0495176	1	5	150.931	Platelet dense granule organization	Abca1
0.0495176	1	5	150.931	ERK5 cascade	Alkal2
0.0501996	2	93	16.2291	Positive regulation of T cell differentiation	Il4ra Zbtb16
0.0509296	2	94	16.0565	Regulation of alpha-beta T cell activation	Il4ra Zbtb16
0.0509296	6	1323	3.42247	Cellular response to endogenous stimulus	Ramp2 Lpl Casp4 Icam1 Gja1 Ntrk2
0.0513518	1	6	125.776	Amylin receptor signaling pathway	Ramp2
0.0513518	1	6	125.776	Asymmetric stem cell division	Zbtb16
0.0513518	1	6	125.776	Germline stem cell asymmetric division	Zbtb16
0.0513518	1	6	125.776	Sphingolipid translocation	Abca1
0.0513518	1	6	125.776	Negative regulation of trophoblast cell migration	Gja1
0.0513518	1	6	125.776	Ethanol oxidation	Adh1
0.0513518	2	101	14.9437	Negative regulation of leukocyte differentiation	Clec2d Il4ra
0.0513518	1	6	125.776	Positive regulation of metallopeptidase activity	Antxr1
0.0513518	2	96	15.722	Dicarboxylic acid transport	Gja1 Ntrk2
0.0513518	4	604	4.99772	Sensory organ development	Gja1 Ntrk2 Maf Mfap2
0.0513518	1	6	125.776	Opsonization	Spon2
0.0513518	7	1774	2.97778	Reproduction	Ramp2 Antxr1 Casp4 Icam1 Gja1 Cxcl12 Zbtb16
0.0513518	7	1773	2.97946	Reproductive process	Ramp2 Antxr1 Casp4 Icam1 Gja1 Cxcl12 Zbtb16
0.0513518	5	937	4.02698	Regulation of anatomical structure morphogenesis	Ramp2 Icam1 Gja1 Ntrk2 Cxcl12
0.0513518	2	97	15.5599	Positive regulation of protein binding	Ramp2 Spon1
0.0513518	1	6	125.776	Regulation of Cdc42 protein signal transduction	Abca1
0.0513518	2	101	14.9437	Positive regulation of tumor necrosis factor production	Lpl Spon2
0.0513518	4	594	5.08185	Cellular response to hormone stimulus	Ramp2 Lpl Gja1 Ntrk2
0.0513518	1	6	125.776	Glutathione transmembrane transport	Gja1
0.0513518	1	6	125.776	T cell activation via T cell receptor contact with antigen bound to MHC molecule on antigen presenting cell	Icam1
0.0513518	1	6	125.776	Tripeptide transmembrane transport	Gja1
0.0513518	4	590	5.11631	Positive regulation of locomotion	Cxcl16 Aoc3 Icam1 Cxcl12
0.0513518	1	6	125.776	Germ-line stem cell division	Zbtb16
0.0513518	2	99	15.2456	Vasoconstriction	Icam1 Gja1
0.0513518	2	101	14.9437	Myeloid leukocyte mediated immunity	Il4ra Spon2
0.0513518	2	97	15.5599	Negative regulation of myeloid cell differentiation	Clec2d Zbtb16
0.0513518	1	6	125.776	Positive regulation of axon extension involved in axon guidance	Cxcl12
0.0513518	2	97	15.5599	Positive regulation of axonogenesis	Ntrk2 Cxcl12
0.0513518	1	6	125.776	Regulation of NK T cell differentiation	Zbtb16
0.0513518	4	590	5.11631	Positive regulation of cellular component movement	Cxcl16 Aoc3 Icam1 Cxcl12
0.0522638	2	103	14.6535	Positive regulation of tumor necrosis factor superfamily cytokine production	Lpl Spon2
0.0522638	2	103	14.6535	Negative regulation of hemopoiesis	Clec2d Il4ra
0.0522638	2	103	14.6535	Positive regulation of interleukin-6 production	Lpl Spon2
0.0522638	5	966	3.90608	Regulation of cellular component biogenesis	Abca1 Antxr1 Icam1 Gja1 Ntrk2
0.0523999	3	316	7.16445	Regulation of ERK1 and ERK2 cascade	Icam1 Alkal2 Cxcl12
0.0524126	2	104	14.5126	Interleukin-1 production	Lpl Casp4
0.0524126	2	104	14.5126	Regulation of interleukin-1 production	Lpl Casp4
0.0524126	7	1822	2.89933	Locomotion	Cxcl16 Aoc3 Igsf10 Icam1 Gja1 Ntrk2 Cxcl12
0.0533168	1	7	107.808	Calcitonin family receptor signaling pathway	Ramp2
0.0533168	1	7	107.808	Positive regulation of fear response	Gja1
0.0533168	1	7	107.808	Regulation of mesodermal cell differentiation	Gja1
0.0533168	2	108	13.9751	Positive regulation of lipid localization	Abca1 Lpl
0.0533168	1	7	107.808	Positive regulation of behavioral fear response	Gja1
0.0533168	5	978	3.85816	Cell activation	Il4ra Icam1 Gja1 Cxcl12 Zbtb16
0.0533168	1	7	107.808	Positive regulation of cholesterol storage	Lpl
0.0533168	1	7	107.808	Virion attachment to host cell	Icam1
0.0533168	1	7	107.808	Brain-derived neurotrophic factor receptor signaling pathway	Ntrk2
0.0533168	2	107	14.1057	Chondrocyte differentiation	Maf Zbtb16
0.0533168	1	7	107.808	Protection from natural killer cell mediated cytotoxicity	Clec2d
0.0533168	4	626	4.82208	Regulation of MAPK cascade	Icam1 Alkal2 Ntrk2 Cxcl12
0.0533168	1	7	107.808	T cell antigen processing and presentation	Icam1
0.0533168	2	108	13.9751	Positive regulation of lymphocyte differentiation	Il4ra Zbtb16
0.0533168	1	7	107.808	Positive regulation of T-helper 2 cell differentiation	Il4ra
0.0533168	1	7	107.808	Post-embryonic eye morphogenesis	Mfap2
0.0533168	4	623	4.8453	Blood vessel morphogenesis	Ramp2 Gja1 Ntrk2 Cxcl12
0.0533168	3	321	7.05285	Regulation of inflammatory response	Lpl Aoc3 Casp4
0.0533168	7	1841	2.86941	Regulation of transport	Abca1 Aoc3 Il4ra Icam1 Gja1 Ntrk2 Cxcl12
0.0533168	5	995	3.79224	Positive regulation of transport	Abca1 Aoc3 Il4ra Gja1 Cxcl12
0.0533168	1	7	107.808	Regulation of blood vessel remodeling	Gja1
0.0533168	1	7	107.808	Regulation of ventricular cardiac muscle cell membrane depolarization	Gja1
0.0538784	4	635	4.75373	Muscle structure development	Ramp2 Il4ra Gja1 Cxcl12
0.0540273	2	111	13.5974	Alpha-beta T cell differentiation	Il4ra Zbtb16
0.0540273	2	111	13.5974	Negative regulation of immune effector process	Clec2d Il4ra
0.0543771	3	334	6.77834	Positive regulation of secretion by cell	Il4ra Gja1 Cxcl12
0.0543771	3	334	6.77834	Regulation of immune effector process	Clec2d Il4ra Spon2
0.0544553	4	641	4.70924	Regulation of secretion by cell	Il4ra Gja1 Ntrk2 Cxcl12
0.0544553	3	335	6.75811	ERK1 and ERK2 cascade	Icam1 Alkal2 Cxcl12
0.0559408	7	1884	2.80392	Apoptotic process	Ramp2 Casp4 Icam1 Gja1 Ntrk2 Cxcl12 Zbtb16
0.0567521	1	8	94.3319	Dendritic cell apoptotic process	Cxcl12
0.0567521	1	8	94.3319	Establishment of Sertoli cell barrier	Icam1
0.0567521	2	116	13.0113	Epithelial cell apoptotic process	Ramp2 Icam1
0.0567521	1	8	94.3319	Regulation of dendritic cell apoptotic process	Cxcl12
0.0567521	1	8	94.3319	Germ cell migration	Cxcl12
0.0567521	1	8	94.3319	Positive regulation of sequestering of triglyceride	Lpl
0.0567521	1	8	94.3319	Ectopic germ cell programmed cell death	Casp4
0.0567521	2	117	12.9001	T cell activation involved in immune response	Il4ra Icam1
0.0567521	1	8	94.3319	Adhesion of symbiont to host cell	Icam1
0.0567521	2	116	13.0113	Acute inflammatory response	Aoc3 Icam1
0.0567521	5	1029	3.66693	Secretion	Abca1 Il4ra Gja1 Ntrk2 Cxcl12
0.0567521	1	8	94.3319	Negative regulation of cellular extravasation	Cxcl12
0.0568423	2	118	12.7908	Myotube differentiation	Il4ra Cxcl12
0.0568423	2	118	12.7908	Positive regulation of production of molecular mediator of immune response	Il4ra Spon2
0.0571691	6	1453	3.11626	Positive regulation of protein metabolic process	Antxr1 Icam1 Spon1 Gja1 Alkal2 Ntrk2
0.0573395	3	349	6.48701	Camera-type eye development	Gja1 Ntrk2 Maf
0.0584832	3	352	6.43172	Response to steroid hormone	Ramp2 Ntrk2 Adh1
0.0587118	5	1043	3.61771	Response to organic cyclic compound	Ramp2 Abca1 Gja1 Ntrk2 Adh1
0.060007	1	9	83.8506	Ethanol catabolic process	Adh1
0.060007	1	9	83.8506	Negative regulation of extracellular matrix organization	Antxr1
0.060007	1	9	83.8506	Cellular response to brain-derived neurotrophic factor stimulus	Ntrk2
0.060007	5	1056	3.57318	Cell morphogenesis	Antxr1 Icam1 Gja1 Ntrk2 Cxcl12
0.060007	7	1938	2.72579	Programmed cell death	Ramp2 Casp4 Icam1 Gja1 Ntrk2 Cxcl12 Zbtb16
0.060007	2	124	12.1719	Regulation of ossification	Gja1 Zbtb16
0.060007	1	9	83.8506	Negative regulation of gonadotropin secretion	Gja1
0.060007	1	9	83.8506	Very-low-density lipoprotein particle remodeling	Lpl
0.060007	1	9	83.8506	Glutathione transport	Gja1
0.060007	1	9	83.8506	Tripeptide transport	Gja1
0.060007	2	125	12.0745	Positive regulation of inflammatory response	Lpl Aoc3
0.060007	1	9	83.8506	Regulation of atrial cardiac muscle cell membrane depolarization	Gja1
0.060007	1	9	83.8506	Cellular response to parathyroid hormone stimulus	Gja1
0.0607311	2	126	11.9787	Endothelium development	Icam1 Gja1
0.0614568	2	127	11.8843	Feeding behavior	Aoc3 Ntrk2
0.063081	2	129	11.7001	Negative regulation of leukocyte cell-cell adhesion	Il4ra Cxcl12
0.063081	3	370	6.11883	Muscle cell differentiation	Ramp2 Il4ra Cxcl12
0.0632581	1	10	75.4655	Action potential propagation	Ntrk2
0.0632581	4	701	4.30616	Regulation of plasma membrane bounded cell projection organization	Icam1 Alkal2 Ntrk2 Cxcl12
0.0632581	1	10	75.4655	Positive regulation of tumor necrosis factor-mediated signaling pathway	Casp4
0.0632581	1	10	75.4655	Regulation of fear response	Gja1
0.0632581	3	376	6.02118	Regulation of hemopoiesis	Clec2d Il4ra Zbtb16
0.0632581	1	10	75.4655	Regulation of behavioral fear response	Gja1
0.0632581	1	10	75.4655	Positive regulation of vasculogenesis	Ramp2
0.0632581	4	703	4.29391	Regulation of cytokine production	Lpl Il4ra Casp4 Spon2
0.0632581	2	131	11.5215	Organophosphate ester transport	Abca1 Gja1
0.0632581	1	10	75.4655	Neuronal action potential propagation	Ntrk2
0.0632581	1	10	75.4655	Positive regulation of dopamine secretion	Cxcl12
0.0632581	1	10	75.4655	Triglyceride-rich lipoprotein particle remodeling	Lpl
0.0632581	1	10	75.4655	High-density lipoprotein particle assembly	Abca1
0.0632581	1	10	75.4655	Post-embryonic animal organ morphogenesis	Mfap2
0.0632791	2	133	11.3482	Regulation of endothelial cell proliferation	Gja1 Cxcl12
0.0632791	2	133	11.3482	Embryonic limb morphogenesis	Gja1 Zbtb16
0.0632791	2	133	11.3482	Embryonic appendage morphogenesis	Gja1 Zbtb16
0.0637079	4	707	4.26962	MAPK cascade	Icam1 Alkal2 Ntrk2 Cxcl12
0.0638035	2	134	11.2635	Adenylate cyclase-activating G protein-coupled receptor signaling pathway	Ramp2 Abca1
0.064048	4	710	4.25158	Cytokine production	Lpl Il4ra Casp4 Spon2
0.064048	4	710	4.25158	Regulation of cell adhesion	Il4ra Icam1 Cxcl12 Zbtb16
0.0642471	3	382	5.92661	Peptidyl-tyrosine phosphorylation	Icam1 Alkal2 Ntrk2
0.064507	3	383	5.91114	Ossification	Igsf10 Gja1 Zbtb16
0.0646838	1	11	68.605	Establishment of endothelial intestinal barrier	Icam1
0.0646838	1	11	68.605	Regulation of glucocorticoid receptor signaling pathway	Ntrk2
0.0646838	1	11	68.605	Regulation of cell communication by electrical coupling	Gja1
0.0646838	1	11	68.605	NK T cell differentiation	Zbtb16
0.0646838	3	385	5.88043	Peptidyl-tyrosine modification	Icam1 Alkal2 Ntrk2
0.0646838	4	718	4.20421	Regulation of cell projection organization	Icam1 Alkal2 Ntrk2 Cxcl12
0.0646838	2	138	10.937	Regulation of fat cell differentiation	Lpl Zbtb16
0.0646838	1	11	68.605	Regulation of T-helper 1 cell differentiation	Il4ra
0.0646838	1	11	68.605	Peripheral nervous system neuron differentiation	Ntrk2
0.0646838	1	11	68.605	Peripheral nervous system neuron development	Ntrk2
0.0646838	3	388	5.83496	Positive regulation of secretion	Il4ra Gja1 Cxcl12
0.0646838	3	385	5.88043	Regulation of binding	Ramp2 Ebf2 Spon1
0.0646838	1	11	68.605	Positive regulation of macrophage cytokine production	Spon2
0.0646838	1	11	68.605	Cell communication by electrical coupling involved in cardiac conduction	Gja1
0.0657136	4	726	4.15788	Regulation of secretion	Il4ra Gja1 Ntrk2 Cxcl12
0.0662139	6	1560	2.90252	Negative regulation of response to stimulus	Lpl Clec2d Il4ra Icam1 Gja1 Cxcl12
0.0662506	3	394	5.74611	Positive regulation of response to external stimulus	Lpl Aoc3 Cxcl12
0.0667481	1	12	62.8879	Vascular associated smooth muscle cell development	Ramp2
0.0667481	1	12	62.8879	Ethanol metabolic process	Adh1
0.0667481	1	12	62.8879	Positive regulation of chemokine (C-X-C motif) ligand 2 production	Lpl
0.0667481	1	12	62.8879	Positive regulation of macrophage derived foam cell differentiation	Lpl
0.0667481	1	12	62.8879	Regulation of sequestering of triglyceride	Lpl
0.0667481	2	145	10.409	Antimicrobial humoral response	Spon2 Cxcl12
0.0667481	1	12	62.8879	Primary alcohol catabolic process	Adh1
0.0667481	4	739	4.08474	Cell junction organization	Ramp2 Lgi2 Gja1 Ntrk2
0.0667481	1	12	62.8879	Adherens junction assembly	Ramp2
0.0667481	1	12	62.8879	Response to laminar fluid shear stress	Abca1
0.0667481	1	12	62.8879	Maintenance of protein localization in endoplasmic reticulum	Gja1
0.0667481	2	142	10.6289	Multicellular organismal signaling	Gja1 Ntrk2
0.0667481	1	12	62.8879	Behavioral response to ethanol	Adh1
0.0667481	1	12	62.8879	Regulation of glomerular filtration	Gja1
0.0667481	1	12	62.8879	Basement membrane assembly	Ramp2
0.0667481	5	1135	3.32447	Circulatory system development	Ramp2 Antxr1 Gja1 Ntrk2 Cxcl12
0.0667481	1	12	62.8879	T cell extravasation	Icam1
0.0669063	4	742	4.06822	Innate immune response	Cxcl16 Clec2d Casp4 Spon2
0.0670677	2	146	10.3377	Regulation of T cell differentiation	Il4ra Zbtb16
0.0686295	2	148	10.198	Endothelial cell proliferation	Gja1 Cxcl12
0.0691223	2	149	10.1296	Blood vessel diameter maintenance	Icam1 Gja1
0.0691223	1	13	58.0504	Regulation of extracellular matrix assembly	Antxr1
0.0691223	1	13	58.0504	Regulation of metallopeptidase activity	Antxr1
0.0691223	2	151	9.99543	Cell-cell junction assembly	Ramp2 Gja1
0.0691223	3	413	5.48176	Regulation of cell growth	Cxcl16 Gja1 Cxcl12
0.0691223	3	412	5.49506	Cytokine-mediated signaling pathway	Il4ra Casp4 Cxcl12
0.0691223	1	13	58.0504	Cdc42 protein signal transduction	Abca1
0.0691223	1	13	58.0504	Phospholipid efflux	Abca1
0.0691223	2	150	10.0621	Regulation of tube size	Icam1 Gja1
0.0691223	2	149	10.1296	Regulation of tube diameter	Icam1 Gja1
0.0691223	1	13	58.0504	Regulation of T-helper 2 cell differentiation	Il4ra
0.0691223	1	13	58.0504	Retinal rod cell development	Ntrk2
0.0691223	3	412	5.49506	Negative regulation of immune system process	Clec2d Il4ra Cxcl12
0.0691223	1	13	58.0504	Response to parathyroid hormone	Gja1
0.0692287	3	415	5.45534	Positive regulation of cell projection organization	Alkal2 Ntrk2 Cxcl12
0.0692287	2	152	9.92967	Lipid homeostasis	Abca1 Lpl
0.0697337	2	153	9.86477	Interleukin-6 production	Lpl Spon2
0.0697337	2	153	9.86477	Regulation of interleukin-6 production	Lpl Spon2
0.0698558	3	418	5.41619	Regulation of metal ion transport	Icam1 Gja1 Cxcl12
0.0702381	2	154	9.80072	Alpha-beta T cell activation	Il4ra Zbtb16
0.0709197	2	155	9.73749	Response to estradiol	Ramp2 Gja1
0.0712922	1	14	53.9039	Trans-synaptic signaling, modulating synaptic transmission	Ntrk2
0.0712922	1	14	53.9039	Regulation of leukocyte tethering or rolling	Cxcl12
0.0712922	1	14	53.9039	Regulation of vasculogenesis	Ramp2
0.0712922	1	14	53.9039	Cellular defense response	Clec2d
0.0712922	1	14	53.9039	Oxygen transport	Hbb-bs
0.0712922	1	14	53.9039	Sequestering of triglyceride	Lpl
0.0712922	2	156	9.67507	Appendage morphogenesis	Gja1 Zbtb16
0.0712922	2	156	9.67507	Limb morphogenesis	Gja1 Zbtb16
0.0712922	1	14	53.9039	Reverse cholesterol transport	Abca1
0.0712922	1	14	53.9039	Induction of positive chemotaxis	Cxcl12
0.0730214	5	1191	3.16816	Developmental process involved in reproduction	Casp4 Icam1 Gja1 Cxcl12 Zbtb16
0.0741548	1	15	50.3103	Regulation of trophoblast cell migration	Gja1
0.0741548	1	15	50.3103	Inhibitory synapse assembly	Lgi2
0.0741548	1	15	50.3103	Negative regulation of anoikis	Ntrk2
0.0741548	1	15	50.3103	Adult heart development	Gja1
0.0741548	6	1658	2.73096	Positive regulation of cell communication	Casp4 Icam1 Gja1 Alkal2 Ntrk2 Cxcl12
0.0741548	1	15	50.3103	Regulation of cholesterol storage	Lpl
0.0741548	2	163	9.25957	Cell killing	Clec2d Cxcl12
0.0741548	1	15	50.3103	Renal system process involved in regulation of blood volume	Gja1
0.0741548	1	15	50.3103	Positive regulation of chromatin binding	Ebf2
0.0741548	1	15	50.3103	Oligopeptide transmembrane transport	Gja1
0.0741548	2	162	9.31673	Regulation of production of molecular mediator of immune response	Il4ra Spon2
0.0748559	2	165	9.14734	Amino acid transport	Gja1 Ntrk2
0.0748559	6	1665	2.71948	Positive regulation of signaling	Casp4 Icam1 Gja1 Alkal2 Ntrk2 Cxcl12
0.0748559	2	165	9.14734	Tumor necrosis factor production	Lpl Spon2
0.0748559	2	165	9.14734	Regulation of tumor necrosis factor production	Lpl Spon2
0.0752837	2	168	8.98399	Regulation of tumor necrosis factor superfamily cytokine production	Lpl Spon2
0.0752837	2	168	8.98399	Male gonad development	Icam1 Gja1
0.0752837	1	16	47.1659	Post-embryonic animal morphogenesis	Mfap2
0.0752837	1	16	47.1659	Macrophage cytokine production	Spon2
0.0752837	1	16	47.1659	Regulation of macrophage cytokine production	Spon2
0.0752837	1	16	47.1659	ATP transport	Gja1
0.0752837	2	168	8.98399	Adult behavior	Cxcl12 Adh1
0.0752837	1	16	47.1659	Corticosteroid receptor signaling pathway	Ntrk2
0.0752837	1	16	47.1659	Regulation of gonadotropin secretion	Gja1
0.0752837	1	16	47.1659	Glucocorticoid receptor signaling pathway	Ntrk2
0.0752837	3	446	5.07616	Response to peptide hormone	Lpl Gja1 Cxcl12
0.0752837	2	169	8.93083	Development of primary male sexual characteristics	Icam1 Gja1
0.0752837	2	166	9.09223	Eye morphogenesis	Ntrk2 Mfap2
0.0752837	1	16	47.1659	Phospholipid homeostasis	Abca1
0.0752837	1	16	47.1659	Negative regulation of cardiac muscle cell proliferation	Gja1
0.0752837	1	16	47.1659	Trophoblast cell migration	Gja1
0.0752837	2	168	8.98399	Tumor necrosis factor superfamily cytokine production	Lpl Spon2
0.0757582	2	170	8.8783	Positive regulation of leukocyte differentiation	Il4ra Zbtb16
0.0757582	2	170	8.8783	Positive regulation of hemopoiesis	Il4ra Zbtb16
0.0778204	4	821	3.67676	Cell-cell adhesion	Il4ra Icam1 Cxcl12 Zbtb16
0.0778204	2	174	8.6742	Regulation of lipid localization	Abca1 Lpl
0.0778204	1	17	44.3915	Programmed cell death involved in cell development	Casp4
0.0778204	1	17	44.3915	Cholesterol storage	Lpl
0.0778204	1	17	44.3915	Adhesion of symbiont to host	Icam1
0.0778204	1	17	44.3915	T-helper 2 cell differentiation	Il4ra
0.0778204	1	17	44.3915	Aldehyde biosynthetic process	Adh1
0.0778204	1	17	44.3915	Positive regulation of type 2 immune response	Il4ra
0.0778204	1	17	44.3915	Retinal rod cell differentiation	Ntrk2
0.0778204	1	17	44.3915	Cellular response to low-density lipoprotein particle stimulus	Lpl
0.0780305	2	175	8.62463	Regulation of axonogenesis	Ntrk2 Cxcl12
0.0781745	2	176	8.57563	Regulation of lymphocyte differentiation	Il4ra Zbtb16
0.0781745	2	176	8.57563	Negative regulation of immune response	Clec2d Il4ra
0.0781745	2	176	8.57563	Sensory perception of mechanical stimulus	Icam1 Cxcl12
0.0781745	2	176	8.57563	Regulation of protein kinase B signaling	Ntrk2 Cxcl12
0.0796626	2	178	8.47927	Negative regulation of cellular amide metabolic process	Spon1 Ntrk2
0.0797062	1	18	41.9253	Regulation of chemokine (C-X-C motif) ligand 2 production	Lpl
0.0797062	1	18	41.9253	Oligopeptide transport	Gja1
0.0797062	1	18	41.9253	Vascular transport	Gja1
0.0797062	1	18	41.9253	Epithelial cell maturation	Gja1
0.0797062	1	18	41.9253	Positive regulation of catecholamine secretion	Cxcl12
0.0797062	1	18	41.9253	Calcium-mediated signaling using intracellular calcium source	Ntrk2
0.0797062	1	18	41.9253	Post-embryonic animal organ development	Mfap2
0.0797062	1	18	41.9253	Positive regulation of cellular extravasation	Icam1
0.0797062	1	18	41.9253	Chemokine (C-X-C motif) ligand 2 production	Lpl
0.0812531	2	182	8.29291	Positive regulation of cell growth	Cxcl16 Cxcl12
0.0831919	1	19	39.7187	Cell communication by electrical coupling	Gja1
0.0831919	1	19	39.7187	Negative regulation of T-helper cell differentiation	Il4ra
0.0831919	1	19	39.7187	Negative regulation of natural killer cell mediated cytotoxicity	Clec2d
0.0831919	1	19	39.7187	Cellular response to cholesterol	Abca1
0.0837063	2	186	8.11457	Negative regulation of cell-cell adhesion	Il4ra Cxcl12
0.0847228	2	189	7.98577	Synapse assembly	Lgi2 Ntrk2
0.0847228	2	188	8.02825	Response to nutrient	Abca1 Lpl
0.0847228	1	20	37.7328	Regulation of macrophage derived foam cell differentiation	Lpl
0.0847228	3	488	4.63927	Cell growth	Cxcl16 Gja1 Cxcl12
0.0847228	1	20	37.7328	Positive regulation of mast cell activation involved in immune response	Il4ra
0.0847228	1	20	37.7328	Positive regulation of intracellular steroid hormone receptor signaling pathway	Ntrk2
0.0847228	1	20	37.7328	Negative regulation of vascular permeability	Ramp2
0.0847228	1	20	37.7328	Positive regulation of mast cell degranulation	Il4ra
0.0847228	2	188	8.02825	Appendage development	Gja1 Zbtb16
0.0847228	1	20	37.7328	Negative regulation of natural killer cell mediated immunity	Clec2d
0.0847228	1	20	37.7328	Detection of temperature stimulus involved in sensory perception of pain	Cxcl12
0.0847228	1	20	37.7328	Detection of mechanical stimulus involved in sensory perception of pain	Cxcl12
0.0847228	1	20	37.7328	Sertoli cell development	Icam1
0.0847228	2	188	8.02825	Limb development	Gja1 Zbtb16
0.0847228	1	20	37.7328	Regulation of ventricular cardiac muscle cell membrane repolarization	Gja1
0.085051	2	191	7.90215	Production of molecular mediator of immune response	Il4ra Spon2
0.0861703	3	492	4.60156	Multicellular organismal homeostasis	Ebf2 Il4ra Gja1
0.0865267	1	21	35.936	Positive regulation of leukocyte adhesion to vascular endothelial cell	Icam1
0.0865267	1	21	35.936	Regulation of anoikis	Ntrk2
0.0865267	1	21	35.936	Asymmetric cell division	Zbtb16
0.0865267	1	21	35.936	Gonadotropin secretion	Gja1
0.0865267	1	21	35.936	Positive regulation of chondrocyte differentiation	Zbtb16
0.0865267	1	21	35.936	Plasma lipoprotein particle assembly	Abca1
0.0865267	6	1787	2.53382	Homeostatic process	Abca1 Lpl Ebf2 Il4ra Icam1 Gja1
0.0865267	1	21	35.936	Positive regulation of T-helper cell differentiation	Il4ra
0.0865267	2	195	7.74005	Male sex differentiation	Icam1 Gja1
0.0865267	2	194	7.77995	Positive regulation of T cell activation	Il4ra Zbtb16
0.0865267	1	21	35.936	Positive regulation of myeloid leukocyte cytokine production involved in immune response	Spon2
0.0869058	2	196	7.70056	Positive regulation of peptidyl-tyrosine phosphorylation	Icam1 Alkal2
0.0876047	4	882	3.42247	Metal ion transport	Ramp2 Icam1 Gja1 Cxcl12
0.0884743	1	22	34.3025	Ventricular cardiac muscle cell membrane repolarization	Gja1
0.0884743	1	22	34.3025	Phagocytosis, recognition	Spon2
0.0884743	1	22	34.3025	Gas transport	Hbb-bs
0.0884743	1	22	34.3025	Negative regulation of leukocyte mediated cytotoxicity	Clec2d
0.0884743	4	887	3.40318	Tube morphogenesis	Ramp2 Gja1 Ntrk2 Cxcl12
0.0884743	1	22	34.3025	Hydrogen peroxide catabolic process	Hbb-bs
0.0884743	1	22	34.3025	Negative regulation of CD4-positive, alpha-beta T cell differentiation	Il4ra
0.0884743	1	22	34.3025	T-helper 1 cell differentiation	Il4ra
0.0884743	2	199	7.58447	Cartilage development	Maf Zbtb16
0.0884743	1	22	34.3025	Positive regulation of monocyte chemotaxis	Cxcl12
0.0891873	3	508	4.45663	Skeletal system development	Gja1 Maf Zbtb16
0.0896671	4	895	3.37276	Positive regulation of intracellular signal transduction	Icam1 Alkal2 Ntrk2 Cxcl12
0.0902021	2	203	7.43503	Lymphocyte activation involved in immune response	Il4ra Icam1
0.0903281	1	23	32.8111	Regulation of bicellular tight junction assembly	Gja1
0.0903281	1	23	32.8111	Positive regulation of cholesterol efflux	Abca1
0.0903281	1	23	32.8111	Positive regulation of lipid storage	Lpl
0.0903281	1	23	32.8111	Protein-lipid complex remodeling	Lpl
0.0903281	1	23	32.8111	Plasma lipoprotein particle remodeling	Lpl
0.0903281	1	23	32.8111	Cellular response to sterol	Abca1
0.0903281	2	204	7.39858	Protein kinase B signaling	Ntrk2 Cxcl12
0.0903281	1	23	32.8111	Leukocyte migration involved in inflammatory response	Aoc3
0.0903281	1	23	32.8111	Detection of temperature stimulus involved in sensory perception	Cxcl12
0.0909104	2	206	7.32675	T cell proliferation	Gja1 Cxcl12
0.0923631	2	208	7.2563	Cell-cell junction organization	Ramp2 Gja1
0.0924067	1	24	31.444	Regulation of cardiac muscle cell membrane repolarization	Gja1
0.0924067	1	24	31.444	Macrophage derived foam cell differentiation	Lpl
0.0924067	3	524	4.32054	Regulation of neuron projection development	Alkal2 Ntrk2 Cxcl12
0.0924067	2	210	7.18719	Positive regulation of neuron projection development	Alkal2 Ntrk2
0.0924067	1	24	31.444	Protein autoprocessing	Casp4
0.0924067	1	24	31.444	Chronic inflammatory response	Gja1
0.0924067	1	24	31.444	Positive regulation of positive chemotaxis	Cxcl12
0.0924067	1	24	31.444	Reflex	Gja1
0.0924067	1	24	31.444	Pyroptosis	Casp4
0.0924067	1	24	31.444	Foam cell differentiation	Lpl
0.093439	2	212	7.11939	Regulation of cell junction assembly	Gja1 Ntrk2
0.093439	1	25	30.1862	Negative regulation of intrinsic apoptotic signaling pathway in response to DNA damage	Cxcl12
0.093439	2	214	7.05285	Adenylate cyclase-modulating G protein-coupled receptor signaling pathway	Ramp2 Abca1
0.093439	1	25	30.1862	Positive regulation of protein processing	Spon1
0.093439	5	1372	2.7502	Positive regulation of cellular protein metabolic process	Antxr1 Icam1 Spon1 Alkal2 Ntrk2
0.093439	1	25	30.1862	Intracellular sterol transport	Abca1
0.093439	1	25	30.1862	Intracellular cholesterol transport	Abca1
0.093439	1	25	30.1862	Protein-containing complex remodeling	Lpl
0.093439	1	25	30.1862	Regulation of chromatin binding	Ebf2
0.093439	2	214	7.05285	Regulation of protein binding	Ramp2 Spon1
0.093439	1	25	30.1862	Regulation of positive chemotaxis	Cxcl12
0.093439	1	25	30.1862	Protein-lipid complex assembly	Abca1
0.093439	1	25	30.1862	Glomerular filtration	Gja1
0.093439	1	25	30.1862	Cellular response to pH	Gja1
0.0941634	2	216	6.98755	Phagocytosis	Abca1 Spon2
0.0941634	3	534	4.23964	Positive regulation of cellular component biogenesis	Abca1 Icam1 Ntrk2
0.0941634	2	216	6.98755	Regulation of myeloid cell differentiation	Clec2d Zbtb16
0.0947916	2	217	6.95535	Leukocyte chemotaxis	Cxcl16 Cxcl12
0.0950484	1	26	29.0252	Renal filtration	Gja1
0.0950484	1	26	29.0252	Positive regulation of amyloid precursor protein catabolic process	Spon1
0.0950484	1	26	29.0252	Negative regulation of cell killing	Clec2d
0.0950484	2	218	6.92344	Response to tumor necrosis factor	Cxcl16 Casp4
0.0950484	1	26	29.0252	Negative regulation of alpha-beta T cell differentiation	Il4ra
0.0950484	2	218	6.92344	Regulation of leukocyte mediated immunity	Clec2d Il4ra
0.0950484	1	26	29.0252	Renal system process involved in regulation of systemic arterial blood pressure	Gja1
0.0950484	1	26	29.0252	Positive regulation of calcium ion import	Cxcl12
0.0965862	1	27	27.9502	Positive regulation of protein maturation	Spon1
0.0965862	1	27	27.9502	Positive regulation of stem cell proliferation	Gja1
0.0965862	2	222	6.7987	Response to mechanical stimulus	Gja1 Cxcl12
0.0965862	1	27	27.9502	Integrin activation	Cxcl12
0.0965862	1	27	27.9502	Retinoic acid metabolic process	Adh1
0.0965862	1	27	27.9502	Positive regulation of macrophage activation	Il4ra
0.0965862	1	27	27.9502	Positive regulation of striated muscle tissue development	Gja1
0.0965862	1	27	27.9502	Positive regulation of muscle organ development	Gja1
0.0965862	1	27	27.9502	Adenine nucleotide transport	Gja1
0.0965862	1	27	27.9502	Response to lipoprotein particle	Lpl
0.0965862	1	27	27.9502	Sertoli cell differentiation	Icam1
0.0965862	1	27	27.9502	Basement membrane organization	Ramp2
0.0974617	6	1900	2.38312	Tissue development	Ebf2 Icam1 Gja1 Maf Cxcl12 Zbtb16
0.0976891	3	551	4.10883	Regulation of anatomical structure size	Icam1 Gja1 Cxcl12
0.0984295	1	28	26.952	Positive regulation of muscle tissue development	Gja1
0.0984295	2	228	6.61978	Receptor-mediated endocytosis	Ramp2 Cxcl16
0.0984295	1	28	26.952	Purine nucleotide transport	Gja1
0.0984295	1	28	26.952	Purine ribonucleotide transport	Gja1
0.0984295	1	28	26.952	Mesodermal cell differentiation	Gja1
0.0984295	1	28	26.952	Negative regulation of oxidoreductase activity	Aoc3
0.0984295	1	28	26.952	Myeloid leukocyte cytokine production	Spon2
0.0984295	1	28	26.952	Regulation of monocyte chemotaxis	Cxcl12
0.0986423	1	29	26.0226	Cardiac muscle cell membrane repolarization	Gja1
0.0986423	1	29	26.0226	Regulation of ruffle assembly	Icam1
0.0986423	2	232	6.50565	Response to ketone	Ramp2 Adh1
0.0986423	1	29	26.0226	Negative regulation of CD4-positive, alpha-beta T cell activation	Il4ra
0.0986423	2	230	6.56222	Negative regulation of apoptotic signaling pathway	Icam1 Cxcl12
0.0986423	2	230	6.56222	Female pregnancy	Ramp2 Gja1
0.0986423	1	29	26.0226	Detection of temperature stimulus	Cxcl12
0.0986423	2	229	6.59087	Protein processing	Casp4 Spon1
0.0986423	1	29	26.0226	Myelination in peripheral nervous system	Ntrk2
0.0986423	1	29	26.0226	Peripheral nervous system axon ensheathment	Ntrk2
0.0986423	1	29	26.0226	Positive regulation of mast cell activation	Il4ra
0.0986423	4	966	3.12487	Negative regulation of apoptotic process	Ramp2 Icam1 Ntrk2 Cxcl12
0.0986423	1	29	26.0226	Positive regulation of leukocyte degranulation	Il4ra
0.0986423	1	29	26.0226	Positive regulation of CD4-positive, alpha-beta T cell differentiation	Il4ra
0.0986423	1	29	26.0226	Positive regulation of acute inflammatory response	Aoc3
0.0986423	2	230	6.56222	Positive regulation of immune effector process	Il4ra Spon2
0.0986423	1	29	26.0226	Regulation of T-helper 1 type immune response	Il4ra
0.0986423	1	29	26.0226	Negative regulation of cardiac muscle tissue growth	Gja1
0.0986423	1	29	26.0226	Negative regulation of heart growth	Gja1
0.100321	1	30	25.1552	Negative regulation of extrinsic apoptotic signaling pathway via death domain receptors	Icam1
0.100321	2	236	6.39538	Response to glucose	Icam1 Gja1
0.100321	5	1438	2.62397	Positive regulation of signal transduction	Casp4 Icam1 Alkal2 Ntrk2 Cxcl12
0.100321	1	30	25.1552	Triglyceride catabolic process	Lpl
0.100321	1	30	25.1552	Acute inflammatory response to antigenic stimulus	Icam1
0.100321	3	569	3.97885	Leukocyte differentiation	Clec2d Il4ra Zbtb16
0.100321	1	30	25.1552	Decidualization	Gja1
0.100321	1	30	25.1552	Leukocyte tethering or rolling	Cxcl12
0.100321	1	30	25.1552	Response to cholesterol	Abca1
0.100321	1	30	25.1552	Cellular response to lipoprotein particle stimulus	Lpl
0.101998	2	239	6.31511	Positive regulation of protein-containing complex assembly	Abca1 Icam1
0.102076	4	987	3.05838	Negative regulation of programmed cell death	Ramp2 Icam1 Ntrk2 Cxcl12
0.102763	1	31	24.3437	Anoikis	Ntrk2
0.102763	1	31	24.3437	Negative regulation of osteoclast differentiation	Clec2d
0.102763	1	31	24.3437	Regulation of axon extension involved in axon guidance	Cxcl12
0.102974	5	1456	2.59154	Vesicle-mediated transport	Ramp2 Abca1 Cxcl16 Il4ra Spon2
0.103926	2	243	6.21115	Response to hexose	Icam1 Gja1
0.103926	2	243	6.21115	Epithelial cell development	Icam1 Gja1
0.103998	1	32	23.583	Regulation of tumor necrosis factor-mediated signaling pathway	Casp4
0.103998	1	32	23.583	Schwann cell development	Ntrk2
0.103998	4	1000	3.01862	Growth	Cxcl16 Igsf10 Gja1 Cxcl12
0.103998	1	32	23.583	Defense response to protozoan	Il4ra
0.103998	1	32	23.583	Sensory perception of temperature stimulus	Cxcl12
0.103998	4	998	3.02467	Negative regulation of developmental process	Clec2d Il4ra Gja1 Zbtb16
0.103998	1	32	23.583	Regulation of type 2 immune response	Il4ra
0.103998	1	32	23.583	Camera-type eye photoreceptor cell differentiation	Ntrk2
0.103998	1	32	23.583	Regulation of membrane repolarization	Gja1
0.10584	3	590	3.83723	Apoptotic signaling pathway	Casp4 Icam1 Cxcl12
0.10584	2	249	6.06149	Regulation of blood circulation	Icam1 Gja1
0.10584	1	33	22.8683	Motor neuron axon guidance	Cxcl12
0.10584	1	33	22.8683	Establishment of mitotic spindle orientation	Gja1
0.10584	1	33	22.8683	Embryonic hindlimb morphogenesis	Zbtb16
0.10584	1	33	22.8683	Response to immobilization stress	Aoc3
0.10584	1	33	22.8683	Positive regulation of cartilage development	Zbtb16
0.10584	1	33	22.8683	Detection of stimulus involved in sensory perception of pain	Cxcl12
0.10632	2	250	6.03724	Response to monosaccharide	Icam1 Gja1
0.107136	1	34	22.1957	Positive regulation of T cell migration	Cxcl12
0.107136	1	34	22.1957	Positive regulation of CD4-positive, alpha-beta T cell activation	Il4ra
0.107136	1	34	22.1957	Nucleotide transport	Gja1
0.107136	2	253	5.96565	Humoral immune response	Spon2 Cxcl12
0.107136	1	34	22.1957	Response to protozoan	Il4ra
0.107136	1	34	22.1957	Intracellular lipid transport	Abca1
0.107136	1	34	22.1957	Response to sterol	Abca1
0.107136	1	34	22.1957	Regulation of mast cell degranulation	Il4ra
0.107136	1	34	22.1957	Modified amino acid transport	Gja1
0.107136	1	34	22.1957	Establishment of epithelial cell polarity	Gja1
0.108714	1	35	21.5616	Positive regulation of vascular associated smooth muscle cell proliferation	Gja1
0.108714	1	35	21.5616	Regulation of cholesterol efflux	Abca1
0.108714	1	35	21.5616	Secretory granule organization	Abca1
0.108714	1	35	21.5616	Xenobiotic transport	Gja1
0.108714	1	35	21.5616	Regulation of T-helper cell differentiation	Il4ra
0.108714	1	35	21.5616	Defense response to fungus	Spon2
0.108714	1	35	21.5616	Positive regulation of synaptic transmission, glutamatergic	Ntrk2
0.108714	1	35	21.5616	Lens fiber cell differentiation	Maf
0.108714	1	35	21.5616	Dopaminergic neuron differentiation	Cxcl12
0.109654	5	1507	2.50383	Regulation of intracellular signal transduction	Abca1 Icam1 Alkal2 Ntrk2 Cxcl12
0.110246	1	36	20.9626	Regulation of intrinsic apoptotic signaling pathway in response to DNA damage	Cxcl12
0.110246	1	36	20.9626	Neuron projection extension involved in neuron projection guidance	Cxcl12
0.110246	1	36	20.9626	Establishment of mitotic spindle localization	Gja1
0.110246	2	260	5.80504	Multi-multicellular organism process	Ramp2 Gja1
0.110246	1	36	20.9626	Embryonic eye morphogenesis	Mfap2
0.110246	1	36	20.9626	Axon extension involved in axon guidance	Cxcl12
0.110246	1	36	20.9626	Acylglycerol homeostasis	Lpl
0.110246	1	36	20.9626	Triglyceride homeostasis	Lpl
0.111418	2	263	5.73882	Adaptive immune response based on somatic recombination of immune receptors built from immunoglobulin superfamily domains	Il4ra Icam1
0.111898	1	37	20.3961	Triglyceride biosynthetic process	Lpl
0.111898	1	37	20.3961	Positive regulation of sterol transport	Abca1
0.111898	1	37	20.3961	Positive regulation of cholesterol transport	Abca1
0.111898	1	37	20.3961	Regulation of mast cell activation involved in immune response	Il4ra
0.111898	1	37	20.3961	Vascular associated smooth muscle cell differentiation	Ramp2
0.111898	1	37	20.3961	Eye photoreceptor cell development	Ntrk2
0.111898	2	265	5.69551	Regulation of peptidyl-tyrosine phosphorylation	Icam1 Alkal2
0.113169	5	1531	2.46458	Plasma membrane bounded cell projection organization	Icam1 Gja1 Alkal2 Ntrk2 Cxcl12
0.113674	1	38	19.8593	Negative regulation of cellular response to insulin stimulus	Lpl
0.113674	1	38	19.8593	Branching involved in blood vessel morphogenesis	Cxcl12
0.113674	2	269	5.61082	T cell differentiation	Il4ra Zbtb16
0.113674	1	38	19.8593	Response to progesterone	Ramp2
0.113674	1	38	19.8593	Positive regulation of behavior	Gja1
0.113674	2	269	5.61082	Positive regulation of lymphocyte activation	Il4ra Zbtb16
0.114221	2	270	5.59004	Gonad development	Icam1 Gja1
0.114417	1	39	19.3501	Positive regulation of morphogenesis of an epithelium	Gja1
0.114417	1	39	19.3501	Dopamine secretion	Cxcl12
0.114417	1	39	19.3501	Regulation of dopamine secretion	Cxcl12
0.114417	1	39	19.3501	Stem cell division	Zbtb16
0.114417	4	1064	2.83705	Neuron projection development	Gja1 Alkal2 Ntrk2 Cxcl12
0.114417	1	39	19.3501	Type 2 immune response	Il4ra
0.114417	1	39	19.3501	Negative regulation of organ growth	Gja1
0.114417	1	39	19.3501	Negative regulation of alpha-beta T cell activation	Il4ra
0.114417	3	632	3.58222	Embryonic morphogenesis	Gja1 Mfap2 Zbtb16
0.114417	2	271	5.56941	Positive regulation of neurogenesis	Ntrk2 Cxcl12
0.114417	1	39	19.3501	Establishment of spindle orientation	Gja1
0.114417	1	39	19.3501	Cellular response to fatty acid	Lpl
0.11611	1	40	18.8664	Regulation of renal system process	Gja1
0.11611	1	40	18.8664	Negative regulation of DNA biosynthetic process	Gja1
0.11611	1	40	18.8664	Cell fate determination	Ebf2
0.11611	1	40	18.8664	Schwann cell differentiation	Ntrk2
0.11611	2	276	5.46852	Organic hydroxy compound transport	Abca1 Cxcl12
0.11611	2	276	5.46852	Negative regulation of cell migration	Gja1 Cxcl12
0.11611	2	276	5.46852	Development of primary sexual characteristics	Icam1 Gja1
0.116944	1	41	18.4062	Positive regulation of lymphocyte migration	Cxcl12
0.116944	5	1564	2.41258	Ion transport	Ramp2 Icam1 Gja1 Ntrk2 Cxcl12
0.116944	1	41	18.4062	Long-term memory	Ntrk2
0.116944	2	280	5.39039	Response to carbohydrate	Icam1 Gja1
0.116944	3	644	3.51547	Epithelial cell differentiation	Icam1 Gja1 Maf
0.116944	1	41	18.4062	Forelimb morphogenesis	Zbtb16
0.116944	1	41	18.4062	Hindlimb morphogenesis	Zbtb16
0.116944	1	41	18.4062	Neutral lipid catabolic process	Lpl
0.116944	1	41	18.4062	Acylglycerol catabolic process	Lpl
0.116944	1	41	18.4062	Negative regulation of leukocyte migration	Cxcl12
0.116944	1	41	18.4062	Maintenance of protein localization in organelle	Gja1
0.116944	1	41	18.4062	Membrane repolarization	Gja1
0.117083	5	1570	2.40336	Cell projection organization	Icam1 Gja1 Alkal2 Ntrk2 Cxcl12
0.117747	2	282	5.35216	Response to alcohol	Abca1 Adh1
0.118324	2	283	5.33325	Striated muscle cell differentiation	Il4ra Cxcl12
0.118725	2	284	5.31447	Negative regulation of cell adhesion	Il4ra Cxcl12
0.118725	1	42	17.968	Maternal placenta development	Gja1
0.118725	1	42	17.968	Regulation of natural killer cell mediated cytotoxicity	Clec2d
0.118821	2	285	5.29583	Sensory organ morphogenesis	Ntrk2 Mfap2
0.118821	2	285	5.29583	Telencephalon development	Ntrk2 Cxcl12
0.118821	2	285	5.29583	Positive regulation of growth	Cxcl16 Cxcl12
0.1194	1	43	17.5501	Regulation of extracellular matrix organization	Antxr1
0.1194	1	43	17.5501	Negative regulation of endothelial cell proliferation	Gja1
0.1194	1	43	17.5501	Neurotrophin signaling pathway	Ntrk2
0.1194	2	288	5.24066	Leukocyte activation involved in immune response	Il4ra Icam1
0.1194	1	43	17.5501	Regulation of vascular permeability	Ramp2
0.1194	3	656	3.45117	Neuron projection morphogenesis	Gja1 Ntrk2 Cxcl12
0.1194	1	43	17.5501	Detection of mechanical stimulus involved in sensory perception	Cxcl12
0.1194	1	43	17.5501	Negative regulation of adaptive immune response based on somatic recombination of immune receptors built from immunoglobulin superfamily domains	Il4ra
0.1194	4	1100	2.7442	Negative regulation of cell death	Ramp2 Icam1 Ntrk2 Cxcl12
0.1194	1	43	17.5501	Cell communication involved in cardiac conduction	Gja1
0.120544	2	290	5.20452	Negative regulation of cell motility	Gja1 Cxcl12
0.120544	2	290	5.20452	Peptide secretion	Abca1 Gja1
0.120872	2	291	5.18663	Intrinsic apoptotic signaling pathway	Casp4 Cxcl12
0.120872	2	291	5.18663	Cell activation involved in immune response	Il4ra Icam1
0.120872	1	44	17.1513	T-helper 1 type immune response	Il4ra
0.120872	1	44	17.1513	Regulation of natural killer cell mediated immunity	Clec2d
0.120872	1	44	17.1513	Regulation of cardiac muscle cell proliferation	Gja1
0.121016	3	665	3.40446	Regulation of growth	Cxcl16 Gja1 Cxcl12
0.121518	4	1111	2.71703	Tube development	Ramp2 Gja1 Ntrk2 Cxcl12
0.122061	1	45	16.7701	Ruffle assembly	Icam1
0.122061	3	670	3.37905	Plasma membrane bounded cell projection morphogenesis	Gja1 Ntrk2 Cxcl12
0.122061	1	45	16.7701	Cellular response to nutrient	Lpl
0.122061	1	45	16.7701	Positive regulation of nitric oxide biosynthetic process	Icam1
0.122061	1	45	16.7701	Negative regulation of T cell differentiation	Il4ra
0.122061	2	295	5.11631	Carboxylic acid transport	Gja1 Ntrk2
0.122061	1	45	16.7701	Negative regulation of lymphocyte mediated immunity	Clec2d
0.122494	2	296	5.09902	Protein maturation	Casp4 Spon1
0.122894	1	46	16.4055	Intermembrane lipid transfer	Abca1
0.122894	1	46	16.4055	Positive regulation of nitric oxide metabolic process	Icam1
0.122894	1	46	16.4055	Regulation of T cell migration	Cxcl12
0.122894	1	46	16.4055	Blood vessel remodeling	Gja1
0.122894	1	46	16.4055	Regulation of CD4-positive, alpha-beta T cell differentiation	Il4ra
0.122894	1	46	16.4055	Neutral lipid biosynthetic process	Lpl
0.122894	1	46	16.4055	Acylglycerol biosynthetic process	Lpl
0.122894	3	675	3.35402	Cell projection morphogenesis	Gja1 Ntrk2 Cxcl12
0.122894	1	46	16.4055	Positive regulation of amine transport	Cxcl12
0.122894	1	46	16.4055	Regulation of stem cell proliferation	Gja1
0.123458	2	300	5.03103	Negative regulation of cellular component movement	Gja1 Cxcl12
0.123458	2	300	5.03103	Cell chemotaxis	Cxcl16 Cxcl12
0.124344	1	47	16.0565	Response to pH	Gja1
0.124344	1	47	16.0565	Retinol metabolic process	Adh1
0.124344	5	1627	2.31916	Generation of neurons	Igsf10 Gja1 Alkal2 Ntrk2 Cxcl12
0.124344	1	47	16.0565	Establishment of endothelial barrier	Icam1
0.124344	1	47	16.0565	Regulation of membrane depolarization	Gja1
0.125602	1	48	15.722	Regulation of extrinsic apoptotic signaling pathway via death domain receptors	Icam1
0.125602	1	48	15.722	Regulation of striated muscle tissue development	Gja1
0.125602	1	48	15.722	Positive regulation of cytokine-mediated signaling pathway	Casp4
0.125602	1	48	15.722	Secretion by tissue	Gja1
0.125602	1	48	15.722	Skeletal muscle tissue regeneration	Gja1
0.125602	1	48	15.722	Phospholipid translocation	Abca1
0.125602	1	48	15.722	Regulation of acute inflammatory response	Aoc3
0.125602	1	48	15.722	Negative regulation of adaptive immune response	Il4ra
0.125895	3	689	3.28587	Negative regulation of cell population proliferation	Gja1 Cxcl12 Zbtb16
0.126095	2	307	4.91632	Lymphocyte proliferation	Gja1 Cxcl12
0.126487	4	1144	2.63865	Anatomical structure formation involved in morphogenesis	Ramp2 Il4ra Gja1 Cxcl12
0.126492	2	308	4.90036	Regulation of T cell activation	Il4ra Zbtb16
0.12667	1	49	15.4011	Toxin transport	Antxr1
0.12667	1	49	15.4011	Adherens junction organization	Ramp2
0.12667	1	49	15.4011	Regulation of endocrine process	Gja1
0.12667	1	49	15.4011	Negative regulation of myeloid leukocyte differentiation	Clec2d
0.12667	1	49	15.4011	Regulation of calcium ion import	Cxcl12
0.126961	2	310	4.86874	Mononuclear cell proliferation	Gja1 Cxcl12
0.127872	1	50	15.0931	Behavioral fear response	Gja1
0.127872	1	50	15.0931	Eye photoreceptor cell differentiation	Ntrk2
0.127872	1	50	15.0931	Positive regulation of glucose transmembrane transport	Aoc3
0.127872	2	312	4.83753	Peptide transport	Abca1 Gja1
0.127872	1	50	15.0931	Eating behavior	Aoc3
0.127872	1	50	15.0931	Regulation of leukocyte degranulation	Il4ra
0.127872	2	312	4.83753	Embryonic organ morphogenesis	Gja1 Mfap2
0.127972	3	700	3.23424	Actin cytoskeleton organization	Antxr1 Casp4 Icam1
0.128406	1	51	14.7972	Regulation of muscle tissue development	Gja1
0.128406	1	51	14.7972	Regulation of neuron migration	Igsf10
0.128406	3	704	3.21586	Cell part morphogenesis	Gja1 Ntrk2 Cxcl12
0.128406	1	51	14.7972	Behavioral defense response	Gja1
0.128406	1	51	14.7972	Hydrogen peroxide metabolic process	Hbb-bs
0.128406	1	51	14.7972	Regulation of macrophage activation	Il4ra
0.128406	1	51	14.7972	Mast cell degranulation	Il4ra
0.128406	1	51	14.7972	Positive regulation of axon extension	Cxcl12
0.128406	1	51	14.7972	Alcohol catabolic process	Adh1
0.128406	1	51	14.7972	Establishment of spindle localization	Gja1
0.128406	1	51	14.7972	Adipose tissue development	Ebf2
0.128689	4	1164	2.59332	Epithelium development	Icam1 Gja1 Maf Cxcl12
0.129303	2	318	4.74626	Defense response to bacterium	Adamts4 Spon2
0.129874	1	52	14.5126	Response to fungus	Spon2
0.129874	1	52	14.5126	Regulation of mast cell activation	Il4ra
0.129874	1	52	14.5126	Cholesterol efflux	Abca1
0.129874	1	52	14.5126	Regulation of muscle organ development	Gja1
0.130599	3	713	3.17527	Regulation of ion transport	Icam1 Gja1 Cxcl12
0.130599	2	321	4.7019	Cellular response to external stimulus	Lpl Gja1
0.130997	2	323	4.67279	Sex differentiation	Icam1 Gja1
0.130997	1	53	14.2388	Lipid translocation	Abca1
0.130997	2	323	4.67279	Negative regulation of locomotion	Gja1 Cxcl12
0.130997	1	53	14.2388	Photoreceptor cell development	Ntrk2
0.130997	1	53	14.2388	Negative regulation of lymphocyte differentiation	Il4ra
0.130997	2	322	4.6873	Positive regulation of leukocyte activation	Il4ra Zbtb16
0.131475	2	324	4.65837	Response to hypoxia	Ramp2 Cxcl12
0.132415	1	54	13.9751	Negative regulation of leukocyte apoptotic process	Cxcl12
0.132415	2	326	4.62979	Organic acid transport	Gja1 Ntrk2
0.132415	1	54	13.9751	Dopamine transport	Cxcl12
0.132415	1	54	13.9751	Mast cell activation involved in immune response	Il4ra
0.132415	1	54	13.9751	Detection of mechanical stimulus	Cxcl12
0.133014	4	1187	2.54307	Cation transport	Ramp2 Icam1 Gja1 Cxcl12
0.133179	2	328	4.60156	Positive regulation of nervous system development	Ntrk2 Cxcl12
0.133489	1	55	13.721	Neuromuscular junction development	Ntrk2
0.133489	1	55	13.721	Regulation of lipid storage	Lpl
0.133489	1	55	13.721	Fear response	Gja1
0.133489	3	726	3.11841	Developmental growth	Igsf10 Gja1 Cxcl12
0.133489	1	55	13.721	Positive regulation of response to cytokine stimulus	Casp4
0.133489	1	55	13.721	Sulfur compound transport	Gja1
0.13438	1	56	13.476	Cellular response to nerve growth factor stimulus	Ntrk2
0.13438	1	56	13.476	Phagocytosis, engulfment	Abca1
0.13438	1	56	13.476	Ruffle organization	Icam1
0.13438	1	56	13.476	Positive regulation of ossification	Zbtb16
0.13438	1	56	13.476	Negative regulation of leukocyte mediated immunity	Clec2d
0.13438	1	56	13.476	Spindle localization	Gja1
0.13438	1	56	13.476	Cardiac muscle cell proliferation	Gja1
0.13438	1	56	13.476	Response to ischemia	Gja1
0.13438	1	56	13.476	Cellular response to retinoic acid	Abca1
0.134834	2	334	4.51889	Positive regulation of cell activation	Il4ra Zbtb16
0.134966	5	1714	2.20144	Regulation of cell population proliferation	Il4ra Gja1 Ntrk2 Cxcl12 Zbtb16
0.135055	2	335	4.5054	Maintenance of location	Lpl Gja1
0.135055	2	335	4.5054	Leukocyte proliferation	Gja1 Cxcl12
0.135249	1	57	13.2396	Response to testosterone	Adh1
0.135249	1	57	13.2396	Regulation of bone remodeling	Gja1
0.135249	4	1206	2.503	Neuron development	Gja1 Alkal2 Ntrk2 Cxcl12
0.135249	1	57	13.2396	Brown fat cell differentiation	Ebf2
0.135249	1	57	13.2396	Positive regulation of protein tyrosine kinase activity	Alkal2
0.136109	3	740	3.05941	Negative regulation of cell differentiation	Clec2d Il4ra Zbtb16
0.13656	4	1211	2.49267	Positive regulation of catalytic activity	Antxr1 Icam1 Alkal2 Ntrk2
0.136571	2	339	4.45224	Response to decreased oxygen levels	Ramp2 Cxcl12
0.136573	1	58	13.0113	Regulation of CD4-positive, alpha-beta T cell activation	Il4ra
0.136573	1	58	13.0113	Natural killer cell mediated cytotoxicity	Clec2d
0.136573	1	58	13.0113	Positive regulation of immunoglobulin production	Il4ra
0.137557	1	59	12.7908	Regulation of membrane lipid distribution	Abca1
0.137557	1	59	12.7908	Cellular aldehyde metabolic process	Adh1
0.137557	1	59	12.7908	Regulation of vascular associated smooth muscle cell proliferation	Gja1
0.137557	1	59	12.7908	Response to nerve growth factor	Ntrk2
0.137557	1	59	12.7908	Vascular associated smooth muscle cell proliferation	Gja1
0.137557	1	59	12.7908	Monocyte chemotaxis	Cxcl12
0.137557	1	59	12.7908	Response to antibiotic	Aoc3
0.137557	1	59	12.7908	Positive regulation of cytokine production involved in immune response	Spon2
0.138092	4	1222	2.47023	Chemical homeostasis	Abca1 Lpl Icam1 Gja1
0.138362	2	345	4.37481	Alcohol metabolic process	Abca1 Adh1
0.138362	2	345	4.37481	Positive regulation of cell development	Ntrk2 Cxcl12
0.138362	3	753	3.00659	Positive regulation of protein phosphorylation	Icam1 Alkal2 Ntrk2
0.138362	1	60	12.5776	Natural killer cell mediated immunity	Clec2d
0.138362	1	60	12.5776	Cellular response to vascular endothelial growth factor stimulus	Ramp2
0.138362	1	60	12.5776	Endocrine hormone secretion	Gja1
0.138362	1	60	12.5776	Regulation of protein processing	Spon1
0.138362	1	60	12.5776	Protein transmembrane transport	Abca1
0.139469	2	348	4.3371	Amide transport	Abca1 Gja1
0.140258	1	61	12.3714	Nucleoside metabolic process	Pnp
0.141224	2	351	4.30003	Cell-substrate adhesion	Antxr1 Sned1
0.141497	3	762	2.97108	Cell morphogenesis involved in differentiation	Antxr1 Ntrk2 Cxcl12
0.141499	1	62	12.1719	Positive regulation of regulated secretory pathway	Il4ra
0.141499	1	62	12.1719	Embryo implantation	Gja1
0.141499	1	62	12.1719	Glycerolipid catabolic process	Lpl
0.141499	1	62	12.1719	Regulation of catecholamine secretion	Cxcl12
0.1424	1	63	11.9787	Regulation of protein maturation	Spon1
0.1424	1	63	11.9787	Regulation of lymphocyte migration	Cxcl12
0.1424	1	63	11.9787	Embryonic pattern specification	Zbtb16
0.1424	1	63	11.9787	Heart looping	Gja1
0.1424	5	1765	2.13783	Neurogenesis	Igsf10 Gja1 Alkal2 Ntrk2 Cxcl12
0.1424	1	63	11.9787	Regulation of sterol transport	Abca1
0.1424	1	63	11.9787	Regulation of cholesterol transport	Abca1
0.1424	1	63	11.9787	Regulation of myeloid leukocyte mediated immunity	Il4ra
0.142798	2	357	4.22776	Positive regulation of proteolysis	Antxr1 Spon1
0.142798	2	357	4.22776	Regulation of epithelial cell proliferation	Gja1 Cxcl12
0.142798	2	357	4.22776	Epithelial tube morphogenesis	Gja1 Cxcl12
0.143442	1	64	11.7915	Killing of cells of other organism	Cxcl12
0.143442	1	64	11.7915	T-helper cell differentiation	Il4ra
0.143442	1	64	11.7915	Negative regulation of innate immune response	Clec2d
0.143442	1	64	11.7915	Negative regulation of calcium ion transport	Icam1
0.145107	1	65	11.6101	Plasma membrane invagination	Abca1
0.145107	1	65	11.6101	CD4-positive, alpha-beta T cell differentiation involved in immune response	Il4ra
0.145107	1	65	11.6101	Catecholamine secretion	Cxcl12
0.146111	1	66	11.4342	Telencephalon cell migration	Cxcl12
0.146111	2	364	4.14646	Negative regulation of response to external stimulus	Clec2d Gja1
0.146111	1	66	11.4342	Alpha-beta T cell differentiation involved in immune response	Il4ra
0.146111	1	66	11.4342	Regulation of nitric oxide biosynthetic process	Icam1
0.146111	2	365	4.1351	Regulation of developmental growth	Gja1 Cxcl12
0.146111	1	66	11.4342	Positive chemotaxis	Cxcl12
0.146111	1	66	11.4342	Cardiac conduction	Gja1
0.146214	3	784	2.88771	Actin filament-based process	Antxr1 Casp4 Icam1
0.1464	2	366	4.1238	Response to oxygen levels	Ramp2 Cxcl12
0.146776	1	67	11.2635	Regulation of morphogenesis of an epithelium	Gja1
0.146776	1	67	11.2635	Mesoderm formation	Gja1
0.146776	1	67	11.2635	Alpha-beta T cell activation involved in immune response	Il4ra
0.146776	1	67	11.2635	Retina morphogenesis in camera-type eye	Ntrk2
0.146776	1	67	11.2635	Negative regulation of wound healing	Gja1
0.146776	1	67	11.2635	Intrinsic apoptotic signaling pathway in response to endoplasmic reticulum stress	Casp4
0.146776	1	67	11.2635	Protein localization to endoplasmic reticulum	Gja1
0.147585	2	371	4.06822	Protein secretion	Abca1 Gja1
0.147585	2	370	4.07922	Organic anion transport	Gja1 Ntrk2
0.147585	1	68	11.0979	Endothelial cell development	Icam1
0.147585	1	68	11.0979	Maintenance of protein location in cell	Gja1
0.147585	3	792	2.85854	Cellular component morphogenesis	Gja1 Ntrk2 Cxcl12
0.147585	1	68	11.0979	Inflammatory response to antigenic stimulus	Icam1
0.147585	1	68	11.0979	Determination of heart left/right asymmetry	Gja1
0.147585	1	68	11.0979	Regulation of nitric oxide metabolic process	Icam1
0.147921	2	372	4.05729	Establishment of protein localization to extracellular region	Abca1 Gja1
0.148378	1	69	10.937	Negative regulation of reproductive process	Gja1
0.148378	1	69	10.937	Forebrain cell migration	Cxcl12
0.148378	1	69	10.937	Cell adhesion mediated by integrin	Icam1
0.148378	4	1283	2.35278	Multi-organism reproductive process	Ramp2 Gja1 Cxcl12 Zbtb16
0.148378	1	69	10.937	Response to fatty acid	Lpl
0.148378	1	69	10.937	Embryonic heart tube morphogenesis	Gja1
0.148378	1	69	10.937	Positive regulation of mononuclear cell migration	Cxcl12
0.150111	1	70	10.7808	Regulation of leukocyte mediated cytotoxicity	Clec2d
0.150111	1	70	10.7808	Mesoderm morphogenesis	Gja1
0.150709	1	71	10.6289	Regulation of cellular response to insulin stimulus	Lpl
0.150709	2	380	3.97187	Regulation of apoptotic signaling pathway	Icam1 Cxcl12
0.150709	1	71	10.6289	Retinoid metabolic process	Adh1
0.150709	1	71	10.6289	Regulation of osteoclast differentiation	Clec2d
0.150709	1	71	10.6289	Photoreceptor cell differentiation	Ntrk2
0.150709	1	71	10.6289	Smooth muscle cell differentiation	Ramp2
0.150709	4	1297	2.32739	Multi-organism process	Ramp2 Gja1 Cxcl12 Zbtb16
0.150709	1	71	10.6289	Regulation of cardiac muscle tissue growth	Gja1
0.150709	2	379	3.98235	Protein localization to extracellular region	Abca1 Gja1
0.15177	1	72	10.4813	Peripheral nervous system development	Ntrk2
0.15177	1	72	10.4813	Lactation	Gja1
0.15177	1	72	10.4813	Membrane invagination	Abca1
0.15177	1	72	10.4813	Striated muscle cell proliferation	Gja1
0.15177	1	72	10.4813	Regulation of synaptic transmission, glutamatergic	Ntrk2
0.15177	1	72	10.4813	Maternal process involved in female pregnancy	Gja1
0.152021	2	384	3.9305	Establishment of organelle localization	Il4ra Gja1
0.152497	1	73	10.3377	Negative regulation of response to DNA damage stimulus	Cxcl12
0.152497	1	73	10.3377	Lysosome organization	Abca1
0.152497	1	73	10.3377	Positive regulation of phosphatidylinositol 3-kinase signaling	Ntrk2
0.152497	1	73	10.3377	T cell differentiation involved in immune response	Il4ra
0.152497	1	73	10.3377	Production of molecular mediator involved in inflammatory response	Il4ra
0.152497	1	73	10.3377	Mast cell activation	Il4ra
0.152497	1	73	10.3377	Lytic vacuole organization	Abca1
0.153686	1	74	10.198	Organic hydroxy compound catabolic process	Adh1
0.153686	1	74	10.198	Regulation of tissue remodeling	Gja1
0.153686	1	74	10.198	Leukocyte degranulation	Il4ra
0.153686	1	74	10.198	Cellular response to mechanical stimulus	Gja1
0.153686	1	74	10.198	Stem cell proliferation	Gja1
0.155503	1	75	10.0621	Positive regulation of synapse assembly	Ntrk2
0.156342	1	76	9.92967	Execution phase of apoptosis	Casp4
0.156342	1	76	9.92967	Nitric oxide biosynthetic process	Icam1
0.156342	2	394	3.83074	Lymphocyte differentiation	Il4ra Zbtb16
0.156342	1	76	9.92967	Tumor necrosis factor-mediated signaling pathway	Casp4
0.156342	3	829	2.73096	Positive regulation of phosphorylation	Icam1 Alkal2 Ntrk2
0.156342	1	76	9.92967	Regulation of heart growth	Gja1
0.156342	1	76	9.92967	Cellular response to amino acid stimulus	Ntrk2
0.157811	1	77	9.80072	Carbohydrate derivative transport	Gja1
0.157811	1	77	9.80072	Extrinsic apoptotic signaling pathway via death domain receptors	Icam1
0.157811	1	77	9.80072	Diterpenoid metabolic process	Adh1
0.158866	2	400	3.77328	Adaptive immune response	Il4ra Icam1
0.160041	2	402	3.7545	Myeloid cell differentiation	Clec2d Zbtb16
0.16088	1	79	9.5526	Regulation of bone mineralization	Gja1
0.16088	1	79	9.5526	Mechanoreceptor differentiation	Ntrk2
0.16088	1	79	9.5526	Membrane depolarization	Gja1
0.161392	2	405	3.72669	Regulation of cellular component size	Icam1 Cxcl12
0.162482	1	80	9.43319	Neural retina development	Ntrk2
0.16341	1	81	9.31673	Lysosome localization	Il4ra
0.16341	1	81	9.31673	Regulation of intracellular steroid hormone receptor signaling pathway	Ntrk2
0.16341	1	81	9.31673	Nitric oxide metabolic process	Icam1
0.16341	1	81	9.31673	Regulation of immunoglobulin production	Il4ra
0.16341	1	81	9.31673	Catecholamine transport	Cxcl12
0.16341	1	81	9.31673	Chemokine-mediated signaling pathway	Cxcl12
0.164989	1	82	9.20311	Transmission of nerve impulse	Ntrk2
0.164989	1	82	9.20311	CD4-positive, alpha-beta T cell differentiation	Il4ra
0.166056	1	83	9.09223	Reactive nitrogen species metabolic process	Icam1
0.166056	1	83	9.09223	Regulation of glucose transmembrane transport	Aoc3
0.166056	1	83	9.09223	Regulation of Rho protein signal transduction	Abca1
0.166056	1	83	9.09223	Embryonic heart tube development	Gja1
0.166056	2	415	3.63689	Regulation of neurogenesis	Ntrk2 Cxcl12
0.167446	1	84	8.98399	Negative regulation of response to wounding	Gja1
0.167446	1	84	8.98399	Membrane docking	Icam1
0.167446	1	84	8.98399	Cellular response to acid chemical	Ntrk2
0.168656	1	85	8.8783	Terpenoid metabolic process	Adh1
0.168656	2	421	3.58506	Germ cell development	Cxcl12 Zbtb16
0.168656	1	85	8.8783	Antibacterial humoral response	Spon2
WT Female v WT Male: Over-represented pathways in WT Male
Enrichment FDR	nGenes	Pathway Genes	Fold Enrichment	Pathway	Genes
7.98323e-05	4	33	85.5718	Isoprenoid biosynthetic process	Aldh1a3 Idi1 Fdps Hmgcs1
7.98323e-05	8	444	12.7201	Regulation of endopeptidase activity	Timp1 Slpi Ccn2 Serpine2 F3 Serpine1 S100a8 S100a9
8.34971e-05	8	471	11.991	Regulation of peptidase activity	Timp1 Slpi Ccn2 Serpine2 F3 Serpine1 S100a8 S100a9
0.00011564	4	48	58.8306	Secondary alcohol biosynthetic process	Cyp51 Idi1 Fdps Hmgcs1
0.00011564	4	48	58.8306	Cholesterol biosynthetic process	Cyp51 Idi1 Fdps Hmgcs1
0.00011564	12	1546	5.4797	Defense response	Timp1 Slpi Lcn2 F3 Hp Trf Serpine1 Saa3 S100a8 S100a9 S1pr3 C7
0.000160149	4	54	52.2939	Sterol biosynthetic process	Cyp51 Idi1 Fdps Hmgcs1
0.000244088	3	17	124.583	Terpenoid biosynthetic process	Aldh1a3 Fdps Hmgcs1
0.00033772	5	158	22.3408	Steroid biosynthetic process	Cyp51 Hsd11b1 Idi1 Fdps Hmgcs1
0.000478876	8	698	8.09132	Inflammatory response	Timp1 F3 Hp Serpine1 Saa3 S100a8 S100a9 S1pr3
0.000702853	8	745	7.58086	Response to bacterium	Slpi Lcn2 Hp Trf Serpine1 Saa3 S100a8 S100a9
0.000812443	8	769	7.34427	Regulation of proteolysis	Timp1 Slpi Ccn2 Serpine2 F3 Serpine1 S100a8 S100a9
0.000939567	2	4	352.984	Farnesyl diphosphate biosynthetic process	Fdps Hmgcs1
0.000939567	2	4	352.984	Neutrophil aggregation	S100a8 S100a9
0.00115737	4	107	26.3913	Isoprenoid metabolic process	Aldh1a3 Idi1 Fdps Hmgcs1
0.00136899	2	5	282.387	Farnesyl diphosphate metabolic process	Fdps Hmgcs1
0.00179403	4	127	22.2352	Cholesterol metabolic process	Cyp51 Idi1 Fdps Hmgcs1
0.00179403	2	6	235.323	Negative regulation of plasminogen activation	Serpine2 Serpine1
0.00179403	4	126	22.4117	Positive regulation of cysteine-type endopeptidase activity involved in apoptotic process	Ccn2 F3 S100a8 S100a9
0.00206202	4	135	20.9176	Sterol metabolic process	Cyp51 Idi1 Fdps Hmgcs1
0.00206202	4	134	21.0737	Alcohol biosynthetic process	Cyp51 Idi1 Fdps Hmgcs1
0.00220629	4	139	20.3156	Secondary alcohol metabolic process	Cyp51 Idi1 Fdps Hmgcs1
0.00229387	4	142	19.8864	Positive regulation of cysteine-type endopeptidase activity	Ccn2 F3 S100a8 S100a9
0.00270753	8	1012	5.58077	Defense response to other organism	Slpi Lcn2 Hp Trf Serpine1 S100a8 S100a9 C7
0.00270753	5	303	11.6496	Steroid metabolic process	Cyp51 Hsd11b1 Idi1 Fdps Hmgcs1
0.00270753	5	300	11.7661	Cell chemotaxis	Egr3 Serpine1 Saa3 S100a8 S100a9
0.00284823	6	511	8.28925	Response to wounding	Timp1 Serpine2 F3 Serpine1 Nrep S100a9
0.00284823	2	9	156.882	Autocrine signaling	S100a8 S100a9
0.00304987	5	318	11.1001	Defense response to bacterium	Slpi Lcn2 Hp Trf Serpine1
0.00309106	3	63	33.6175	Iron ion transport	Cp Lcn2 Trf
0.00309106	4	167	16.9094	Blood coagulation	Serpine2 F3 Serpine1 S100a9
0.00309106	4	170	16.611	Hemostasis	Serpine2 F3 Serpine1 S100a9
0.00309106	4	168	16.8088	Positive regulation of endopeptidase activity	Ccn2 F3 S100a8 S100a9
0.00309106	3	64	33.0922	Regulation of blood coagulation	Serpine2 Serpine1 S100a9
0.00309106	9	1403	4.52866	Response to external biotic stimulus	Slpi Lcn2 Hp Trf Serpine1 Saa3 S100a8 S100a9 C7
0.00309106	4	170	16.611	Coagulation	Serpine2 F3 Serpine1 S100a9
0.00309106	9	1400	4.53836	Response to other organism	Slpi Lcn2 Hp Trf Serpine1 Saa3 S100a8 S100a9 C7
0.00312199	3	66	32.0894	Regulation of hemostasis	Serpine2 Serpine1 S100a9
0.00312199	5	345	10.2314	Alcohol metabolic process	Cyp51 Aldh1a3 Idi1 Fdps Hmgcs1
0.00312199	2	11	128.358	Regulation of plasminogen activation	Serpine2 Serpine1
0.00312199	3	66	32.0894	Zymogen activation	Serpine2 Hp Serpine1
0.00312199	3	67	31.6105	Regulation of coagulation	Serpine2 Serpine1 S100a9
0.00316363	9	1439	4.41536	Response to biotic stimulus	Slpi Lcn2 Hp Trf Serpine1 Saa3 S100a8 S100a9 C7
0.00334406	4	185	15.2642	Positive regulation of peptidase activity	Ccn2 F3 S100a8 S100a9
0.00436241	5	377	9.36297	Wound healing	Timp1 Serpine2 F3 Serpine1 S100a9
0.00442237	9	1517	4.18834	Positive regulation of multicellular organismal process	Ccn2 Serpine2 Lcn2 F3 Trf Egr3 Serpine1 S100a9 Fdps
0.00445785	3	79	26.8089	Activation of cysteine-type endopeptidase activity involved in apoptotic process	F3 S100a8 S100a9
0.00445785	9	1524	4.1691	Biological process involved in interspecies interaction between organisms	Slpi Lcn2 Hp Trf Serpine1 Saa3 S100a8 S100a9 C7
0.00495293	4	213	13.2576	Regulation of cysteine-type endopeptidase activity involved in apoptotic process	Ccn2 F3 S100a8 S100a9
0.00495293	3	83	25.5169	Astrocyte differentiation	Serpine2 S100a8 S100a9
0.00495293	8	1215	4.64835	Regulation of hydrolase activity	Timp1 Slpi Ccn2 Serpine2 F3 Serpine1 S100a8 S100a9
0.00500586	2	16	88.246	Peptidyl-cysteine S-nitrosylation	S100a8 S100a9
0.0050137	3	85	24.9165	Terpenoid metabolic process	Aldh1a3 Fdps Hmgcs1
0.0052629	6	645	6.56714	Lipid biosynthetic process	Cyp51 Aldh1a3 Hsd11b1 Idi1 Fdps Hmgcs1
0.00533963	4	223	12.6631	Organic hydroxy compound biosynthetic process	Cyp51 Idi1 Fdps Hmgcs1
0.00533963	2	17	83.055	Protein nitrosylation	S100a8 S100a9
0.00533963	3	89	23.7967	Iron ion homeostasis	Cp Lcn2 Trf
0.00554769	9	1619	3.92447	Immune response	Prg4 Slpi Lcn2 Hp Trf Serpine1 S100a8 S100a9 C7
0.00554769	4	229	12.3313	Protein processing	Serpine2 F3 Hp Serpine1
0.00554769	2	18	78.4409	Leukocyte aggregation	S100a8 S100a9
0.00586115	3	94	22.5309	Cellular oxidant detoxification	Hp S100a8 S100a9
0.00601894	4	236	11.9656	Regulation of cysteine-type endopeptidase activity	Ccn2 F3 S100a8 S100a9
0.00631306	4	240	11.7661	Response to toxic substance	Lcn2 Hp S100a8 S100a9
0.00631841	2	20	70.5968	Positive regulation of hemostasis	Serpine1 S100a9
0.00631841	2	20	70.5968	Positive regulation of blood coagulation	Serpine1 S100a9
0.00733	4	253	11.1615	Humoral immune response	Slpi Trf S100a9 C7
0.00733	2	22	64.1789	Plasminogen activation	Serpine2 Serpine1
0.00733	2	22	64.1789	Positive regulation of coagulation	Serpine1 S100a9
0.00778676	3	108	19.6102	Cellular detoxification	Hp S100a8 S100a9
0.00779184	2	23	61.3885	Leukocyte migration involved in inflammatory response	S100a8 S100a9
0.00818541	3	112	18.9099	Transition metal ion transport	Cp Lcn2 Trf
0.00818541	2	24	58.8306	Negative regulation of protein maturation	Serpine2 Serpine1
0.00818541	2	24	58.8306	Negative regulation of protein processing	Serpine2 Serpine1
0.0086587	3	115	18.4165	Cellular response to toxic substance	Hp S100a8 S100a9
0.0086587	8	1405	4.01975	Regulation of multicellular organismal development	Ccn2 Serpine2 F3 Trf Egr3 Serpine1 Fdps S1pr3
0.0086587	4	275	10.2686	Negative regulation of endopeptidase activity	Timp1 Slpi Serpine2 Serpine1
0.0086587	3	116	18.2578	Acute inflammatory response	F3 Hp Saa3
0.0090486	9	1798	3.53377	Response to oxygen-containing compound	Timp1 Slpi Ccn2 Lcn2 Hp Serpine1 S100a8 S100a9 Hmgcs1
0.0090486	9	1799	3.5318	Proteolysis	Timp1 Slpi Ccn2 Serpine2 F3 Hp Serpine1 S100a8 S100a9
0.0090486	4	281	10.0494	Negative regulation of peptidase activity	Timp1 Slpi Serpine2 Serpine1
0.00946488	3	122	17.3599	Negative regulation of protein catabolic process	Timp1 Cyp51 Serpine2
0.00957402	3	123	17.2187	Detoxification	Hp S100a8 S100a9
0.00968392	3	124	17.0799	Regulation of wound healing	Serpine2 Serpine1 S100a9
0.00979455	3	125	16.9432	Positive regulation of inflammatory response	Serpine1 S100a8 S100a9
0.0101739	7	1111	4.44804	Tube development	Hsd11b1 Ccn2 Serpine2 F3 Egr3 Serpine1 Col8a1
0.0101739	4	296	9.5401	Protein maturation	Serpine2 F3 Hp Serpine1
0.0103349	5	527	6.69799	Organic hydroxy compound metabolic process	Cyp51 Aldh1a3 Idi1 Fdps Hmgcs1
0.0103349	5	527	6.69799	Angiogenesis	Ccn2 F3 Egr3 Serpine1 Col8a1
0.0107252	4	303	9.31971	Negative regulation of catabolic process	Timp1 Cyp51 Serpine2 Hp
0.0109036	5	536	6.58552	Small molecule biosynthetic process	Cyp51 Aldh1a3 Idi1 Fdps Hmgcs1
0.011545	3	136	15.5728	Transition metal ion homeostasis	Cp Lcn2 Trf
0.0137403	3	145	14.6062	Antimicrobial humoral response	Slpi Trf S100a9
0.0148884	4	335	8.42947	Gliogenesis	Serpine2 Trf S100a8 S100a9
0.0150869	2	37	38.1604	Astrocyte development	S100a8 S100a9
0.0157436	2	38	37.1562	NADP metabolic process	Hsd11b1 Fmo2
0.0163995	5	596	5.92255	Chemotaxis	Egr3 Serpine1 Saa3 S100a8 S100a9
0.0165008	5	601	5.87328	Response to inorganic substance	Cp Lcn2 Hp Trf Hmgcs1
0.0165008	5	601	5.87328	Taxis	Egr3 Serpine1 Saa3 S100a8 S100a9
0.0165008	8	1610	3.50791	Regulation of cell differentiation	Ccn2 Serpine2 Trf Egr3 Serpine1 Nrep Fdps S1pr3
0.0166734	6	903	4.69082	Positive regulation of cell differentiation	Ccn2 Serpine2 Trf Egr3 Serpine1 Fdps
0.0169082	3	161	13.1547	Regulation of response to wounding	Serpine2 Serpine1 S100a9
0.0171509	4	357	7.91	Positive regulation of proteolysis	Ccn2 F3 S100a8 S100a9
0.0173458	8	1636	3.45216	Cell motility	Timp1 Ccn2 Trf Egr3 Serpine1 Saa3 S100a8 S100a9
0.0173458	8	1636	3.45216	Localization of cell	Timp1 Ccn2 Trf Egr3 Serpine1 Saa3 S100a8 S100a9
0.0177095	4	363	7.77926	Regulation of body fluid levels	Serpine2 F3 Serpine1 S100a9
0.0177198	4	364	7.75789	Response to lipopolysaccharide	Slpi Serpine1 S100a8 S100a9
0.0178883	5	623	5.66587	Blood vessel morphogenesis	Ccn2 F3 Egr3 Serpine1 Col8a1
0.0190149	4	373	7.5707	Negative regulation of proteolysis	Timp1 Slpi Serpine2 Serpine1
0.0192044	2	45	31.3763	Negative regulation of blood coagulation	Serpine2 Serpine1
0.0196215	2	46	30.6942	Negative regulation of hemostasis	Serpine2 Serpine1
0.0196215	2	46	30.6942	Acute-phase response	Hp Saa3
0.0196215	4	380	7.43124	Response to molecule of bacterial origin	Slpi Serpine1 S100a8 S100a9
0.0201918	2	47	30.0412	Negative regulation of coagulation	Serpine2 Serpine1
0.0204113	8	1704	3.3144	Regulation of cell death	Timp1 Aldh1a3 Ccn2 Hp Egr3 Serpine1 S100a8 S100a9
0.0204113	5	654	5.39731	Positive regulation of cell death	Aldh1a3 Ccn2 Hp S100a8 S100a9
0.0204113	6	967	4.38036	Response to lipid	Slpi Ccn2 Serpine1 S100a8 S100a9 Hmgcs1
0.021178	2	49	28.815	Peptidyl-cysteine modification	S100a8 S100a9
0.0238949	1	2	352.984	Negative regulation of endothelial cell development	S1pr3
0.0238949	1	2	352.984	Isoprenoid biosynthetic process via mevalonate	Hmgcs1
0.0238949	1	2	352.984	Negative regulation of establishment of endothelial barrier	S1pr3
0.0238949	1	2	352.984	Negative regulation of smooth muscle cell-matrix adhesion	Serpine1
0.0238949	1	2	352.984	Regulation of hydrogen peroxide catabolic process	Hp
0.0238949	1	2	352.984	Glucocorticoid catabolic process	Hsd11b1
0.0238949	7	1362	3.62832	Cell adhesion	Ccn2 Serpine2 Egr3 Serpine1 S100a8 S100a9 Col8a1
0.0238949	1	2	352.984	Farnesyl diphosphate biosynthetic process, mevalonate pathway	Hmgcs1
0.0238949	7	1374	3.59663	Biological adhesion	Ccn2 Serpine2 Egr3 Serpine1 S100a8 S100a9 Col8a1
0.0238949	1	2	352.984	Geranyl diphosphate metabolic process	Fdps
0.0238949	1	2	352.984	Geranyl diphosphate biosynthetic process	Fdps
0.0238949	1	2	352.984	Peptidyl-cysteine S-trans-nitrosylation	S100a9
0.0238949	1	2	352.984	Mating plug formation	Serpine2
0.0238949	1	2	352.984	Activation of plasma proteins involved in acute inflammatory response	F3
0.0238949	7	1380	3.581	Positive regulation of developmental process	Ccn2 Serpine2 F3 Trf Egr3 Serpine1 Fdps
0.0238949	1	2	352.984	Seminal vesicle development	Serpine2
0.0238949	2	54	26.147	Positive regulation of wound healing	Serpine1 S100a9
0.0239032	6	1029	4.11643	Secretion	Cyp51 Ccn2 Serpine2 Frmd4a S100a8 S100a9
0.0257084	5	717	4.92307	Blood vessel development	Ccn2 F3 Egr3 Serpine1 Col8a1
0.0257084	2	59	23.9311	Positive regulation of interleukin-8 production	F3 Serpine1
0.0257084	8	1822	3.09975	Locomotion	Timp1 Ccn2 Trf Egr3 Serpine1 Saa3 S100a8 S100a9
0.0257084	2	59	23.9311	Positive regulation of receptor-mediated endocytosis	Trf Serpine1
0.0263817	2	60	23.5323	Regulation of protein processing	Serpine2 Serpine1
0.027884	3	216	9.80511	Myeloid leukocyte migration	Serpine1 S100a8 S100a9
0.028049	3	217	9.75992	Leukocyte chemotaxis	Serpine1 S100a8 S100a9
0.0283676	2	63	22.4117	Regulation of protein maturation	Serpine2 Serpine1
0.0283676	5	742	4.7572	Innate immune response	Slpi Lcn2 S100a8 S100a9 C7
0.0289919	5	747	4.72535	Vasculature development	Ccn2 F3 Egr3 Serpine1 Col8a1
0.0297235	4	459	6.15222	Negative regulation of hydrolase activity	Timp1 Slpi Serpine2 Serpine1
0.0298111	1	3	235.323	Regulation of odontoblast differentiation	Serpine1
0.0298111	2	66	21.393	Positive regulation of intrinsic apoptotic signaling pathway	S100a8 S100a9
0.0298111	2	66	21.393	Cellular iron ion homeostasis	Lcn2 Trf
0.0298111	3	229	9.24849	Phospholipid biosynthetic process	Idi1 Fdps Hmgcs1
0.0298111	8	1900	2.9725	Tissue development	Timp1 Aldh1a3 Ccn2 Serpine2 Serpine1 Fdps S1pr3 Col8a1
0.0298111	1	3	235.323	Siderophore transport	Lcn2
0.0298111	7	1474	3.35263	Cell migration	Timp1 Ccn2 Egr3 Serpine1 Saa3 S100a8 S100a9
0.0298111	1	3	235.323	Response to anoxia	Ccn2
0.0298111	1	3	235.323	Leukotriene production involved in inflammatory response	Serpine1
0.0298111	1	3	235.323	Dimethylallyl diphosphate biosynthetic process	Idi1
0.0298111	1	3	235.323	Dimethylallyl diphosphate metabolic process	Idi1
0.0298111	6	1112	3.80918	Positive regulation of cellular component organization	Ccn2 Serpine2 Lcn2 Trf Serpine1 S100a9
0.0298111	1	3	235.323	Olfactory pit development	Aldh1a3
0.0298111	2	67	21.0737	Negative regulation of wound healing	Serpine2 Serpine1
0.0298111	1	3	235.323	Dense core granule biogenesis	Serpine2
0.0314448	2	71	19.8864	Positive regulation of response to wounding	Serpine1 S100a9
0.0314448	5	783	4.5081	Negative regulation of catalytic activity	Timp1 Slpi Serpine2 Hp Serpine1
0.0314448	3	238	8.89875	Respiratory system development	Aldh1a3 Hsd11b1 Ccn2
0.0317304	6	1135	3.73199	Circulatory system development	Ccn2 F3 Egr3 Serpine1 Fdps Col8a1
0.0327776	6	1144	3.70263	Anatomical structure formation involved in morphogenesis	Aldh1a3 Ccn2 F3 Egr3 Serpine1 Col8a1
0.0330953	3	244	8.67993	Glial cell differentiation	Serpine2 S100a8 S100a9
0.033833	2	75	18.8258	Positive regulation of gliogenesis	Serpine2 Trf
0.033833	3	247	8.57451	Positive regulation of defense response	Serpine1 S100a8 S100a9
0.0342922	2	76	18.5781	Interleukin-8 production	F3 Serpine1
0.0342922	2	76	18.5781	Regulation of interleukin-8 production	F3 Serpine1
0.0365318	1	4	176.492	Regulation of pentose-phosphate shunt	Hsd11b1
0.0365318	1	4	176.492	Arachidonic acid metabolite production involved in inflammatory response	Serpine1
0.0365318	4	513	5.50462	Gland development	Aldh1a3 Serpine2 Hp Hmgcs1
0.0365318	1	4	176.492	Negative regulation of vascular wound healing	Serpine1
0.0365318	1	4	176.492	Harderian gland development	Aldh1a3
0.040013	2	84	16.8088	Negative regulation of response to wounding	Serpine2 Serpine1
0.040013	2	84	16.8088	Negative regulation of protein secretion	Cyp51 Frmd4a
0.0407125	2	85	16.611	Antibacterial humoral response	Slpi Trf
0.0434149	1	5	141.194	Regulation of smooth muscle cell-matrix adhesion	Serpine1
0.0434149	1	5	141.194	Positive regulation of platelet-derived growth factor receptor signaling pathway	F3
0.0434149	1	5	141.194	Optic cup morphogenesis involved in camera-type eye development	Aldh1a3
0.0434149	1	5	141.194	Positive regulation of G0 to G1 transition	Ccn2
0.0434149	1	5	141.194	Oxygen metabolic process	Fmo2
0.0449476	2	91	15.5158	Positive regulation of endothelial cell proliferation	F3 Egr3
0.0454304	5	882	4.00208	Metal ion transport	Cp Ccn2 Serpine2 Lcn2 Trf
0.0460088	5	887	3.97953	Regulation of catabolic process	Timp1 Cyp51 Hsd11b1 Serpine2 Hp
0.0460088	5	887	3.97953	Tube morphogenesis	Ccn2 F3 Egr3 Serpine1 Col8a1
0.048138	1	6	117.661	Dentinogenesis	Serpine1
0.048138	1	6	117.661	Negative regulation of trophoblast cell migration	Timp1
0.048138	1	6	117.661	Regulation of NADP metabolic process	Hsd11b1
0.048138	1	6	117.661	Negative regulation of metallopeptidase activity	Timp1
0.048138	2	97	14.556	Cellular response to fibroblast growth factor stimulus	Ccn2 Egr3
0.048138	1	6	117.661	Regulation of integrin biosynthetic process	S100a9
0.048138	1	6	117.661	Positive regulation of retinoic acid receptor signaling pathway	Aldh1a3
0.048138	1	6	117.661	Negative regulation of membrane protein ectodomain proteolysis	Timp1
0.048138	1	6	117.661	Negative regulation of fibrinolysis	Serpine1
0.048138	1	6	117.661	Positive regulation of oligodendrocyte progenitor proliferation	Trf
0.048138	1	6	117.661	Odontoblast differentiation	Serpine1
0.0508248	2	101	13.9796	Neutrophil chemotaxis	S100a8 S100a9
0.0515381	2	102	13.8425	Integrin-mediated signaling pathway	Timp1 Ccn2
0.0517057	4	590	4.78622	Apoptotic signaling pathway	Lcn2 Serpine1 S100a8 S100a9
0.0529683	2	104	13.5763	Response to fibroblast growth factor	Ccn2 Egr3
0.0539535	1	7	100.853	Negative regulation of hydrogen peroxide metabolic process	Hp
0.0539535	1	7	100.853	Connective tissue replacement involved in inflammatory response wound healing	Timp1
0.0539535	1	7	100.853	Integrin biosynthetic process	S100a9
0.0539535	1	7	100.853	Smooth muscle cell-matrix adhesion	Serpine1
0.0546889	6	1335	3.17289	Lipid metabolic process	Cyp51 Aldh1a3 Hsd11b1 Idi1 Fdps Hmgcs1
0.0560233	2	109	12.9535	Cellular transition metal ion homeostasis	Lcn2 Trf
0.0560233	3	321	6.59783	Regulation of inflammatory response	Serpine1 S100a8 S100a9
0.0603113	3	332	6.37923	Aging	Timp1 Ccn2 Serpine1
0.0603113	1	8	88.246	Response to herbicide	Lcn2
0.0603113	2	114	12.3854	Glial cell development	S100a8 S100a9
0.0616299	2	116	12.1719	Regulation of gliogenesis	Serpine2 Trf
0.0616299	2	116	12.1719	Regulation of receptor-mediated endocytosis	Trf Serpine1
0.0619149	3	337	6.28458	Leukocyte cell-cell adhesion	Egr3 S100a8 S100a9
0.0636536	5	995	3.54758	Positive regulation of transport	Frmd4a Trf Serpine1 S100a8 S100a9
0.0637319	1	9	78.4409	Negative regulation of amyloid-beta clearance	Cyp51
0.0637319	1	9	78.4409	Wound healing involved in inflammatory response	Timp1
0.0637319	2	120	11.7661	Positive regulation of endocytosis	Trf Serpine1
0.0637319	1	9	78.4409	Regulation of fibrinolysis	Serpine1
0.0637319	1	9	78.4409	Positive regulation of cardiac muscle contraction	Ccn2
0.0637319	1	9	78.4409	Embryonic camera-type eye formation	Aldh1a3
0.0637319	1	9	78.4409	Regulation of vascular wound healing	Serpine1
0.0637319	1	9	78.4409	NADPH oxidation	Fmo2
0.064244	7	1841	2.68429	Regulation of transport	Cyp51 Serpine2 Frmd4a Trf Serpine1 S100a8 S100a9
0.0651365	2	123	11.4792	Neutrophil migration	S100a8 S100a9
0.0651365	5	1014	3.4811	Central nervous system development	Aldh1a3 Serpine2 S100a8 S100a9 Hmgcs1
0.0651365	3	351	6.03391	Cell-substrate adhesion	Ccn2 Serpine1 Col8a1
0.0654079	2	124	11.3866	Granulocyte chemotaxis	S100a8 S100a9
0.0661258	2	125	11.2955	Modulation of process of other organism	Slpi S100a9
0.0667715	3	356	5.94917	Leukocyte migration	Serpine1 S100a8 S100a9
0.0671818	1	10	70.5968	Positive regulation of sterol biosynthetic process	Fdps
0.0671818	5	1028	3.4337	Positive regulation of cell population proliferation	Timp1 Ccn2 F3 Trf Egr3
0.0671818	1	10	70.5968	Negative regulation of cell adhesion mediated by integrin	Serpine1
0.0671818	1	10	70.5968	Regulation of iron ion transport	Trf
0.0671818	1	10	70.5968	Positive regulation of cholesterol biosynthetic process	Fdps
0.0681323	2	129	10.9452	Positive regulation of peptide secretion	S100a8 S100a9
0.0681354	3	363	5.83444	Phospholipid metabolic process	Idi1 Fdps Hmgcs1
0.0681354	7	1884	2.62302	Apoptotic process	Timp1 Aldh1a3 Lcn2 Egr3 Serpine1 S100a8 S100a9
0.0689067	1	11	64.1789	Sequestering of iron ion	Lcn2
0.0689067	1	11	64.1789	Connective tissue replacement	Timp1
0.0689067	1	11	64.1789	Diterpenoid biosynthetic process	Aldh1a3
0.0689067	2	133	10.6161	Regulation of endothelial cell proliferation	F3 Egr3
0.0689067	1	11	64.1789	Retinoic acid biosynthetic process	Aldh1a3
0.0689067	1	11	64.1789	Regulation of cellular carbohydrate catabolic process	Hsd11b1
0.0689067	1	11	64.1789	Negative regulation of endothelial cell differentiation	S1pr3
0.0689067	1	11	64.1789	Regulation of timing of cell differentiation	Serpine2
0.0689067	2	133	10.6161	Camera-type eye morphogenesis	Aldh1a3 Col8a1
0.0689067	4	682	4.14057	Positive regulation of hydrolase activity	Ccn2 F3 S100a8 S100a9
0.0689067	4	684	4.12847	Metal ion homeostasis	Cp Lcn2 Trf C7
0.0689067	1	11	64.1789	Righting reflex	Aldh1a3
0.0689067	1	11	64.1789	Regulation of G0 to G1 transition	Ccn2
0.0689067	1	11	64.1789	Cellular response to UV-A	Timp1
0.0711954	1	12	58.8306	Iron coordination entity transport	Lcn2
0.0711954	3	380	5.57343	Regulation of apoptotic signaling pathway	Serpine1 S100a8 S100a9
0.0711954	1	12	58.8306	Insemination	Serpine2
0.0711954	7	1938	2.54994	Programmed cell death	Timp1 Aldh1a3 Lcn2 Egr3 Serpine1 S100a8 S100a9
0.0711954	1	12	58.8306	Negative regulation of phosphatidylinositol 3-kinase signaling	Serpine2
0.0711954	1	12	58.8306	Cerebellar granular layer morphogenesis	Serpine2
0.0711954	1	12	58.8306	Positive regulation of T cell differentiation in thymus	Egr3
0.0711954	1	12	58.8306	G0 to G1 transition	Ccn2
0.0711954	1	12	58.8306	Regulation of gamma-delta T cell differentiation	Egr3
0.0711954	1	12	58.8306	Regulation of gamma-delta T cell activation	Egr3
0.0711954	1	12	58.8306	Oligodendrocyte progenitor proliferation	Trf
0.0711954	1	12	58.8306	Regulation of oligodendrocyte progenitor proliferation	Trf
0.0711954	1	12	58.8306	Cellular response to iron ion	Trf
0.0711954	1	12	58.8306	Positive regulation of cholesterol metabolic process	Fdps
0.0719594	4	710	3.97728	Regulation of cell adhesion	Serpine2 Egr3 Serpine1 Col8a1
0.0719594	3	388	5.45851	Positive regulation of secretion	Frmd4a S100a8 S100a9
0.0719594	2	142	9.94321	Negative regulation of protein transport	Cyp51 Frmd4a
0.0721564	2	143	9.87367	Regulation of epithelial cell differentiation	Serpine1 S1pr3
0.0721564	5	1087	3.24732	Negative regulation of protein metabolic process	Timp1 Cyp51 Slpi Serpine2 Serpine1
0.0729903	1	13	54.3052	Regulation of metallopeptidase activity	Timp1
0.0729903	2	146	9.67079	Positive regulation of apoptotic signaling pathway	S100a8 S100a9
0.0729903	1	13	54.3052	Response to light intensity	Hmgcs1
0.0729903	3	394	5.37539	Positive regulation of response to external stimulus	Serpine1 S100a8 S100a9
0.0729903	3	393	5.38907	Regulation of protein catabolic process	Timp1 Cyp51 Serpine2
0.0729903	6	1517	2.79223	Regulation of apoptotic process	Timp1 Aldh1a3 Egr3 Serpine1 S100a8 S100a9
0.0729903	1	13	54.3052	Nose development	Aldh1a3
0.0729903	1	13	54.3052	Positive regulation of astrocyte differentiation	Serpine2
0.0729903	1	13	54.3052	Extracellular matrix constituent secretion	Ccn2
0.0729903	1	13	54.3052	Negative regulation of platelet aggregation	Serpine2
0.0730544	2	147	9.605	Negative regulation of establishment of protein localization	Cyp51 Frmd4a
0.0734731	2	148	9.5401	Endothelial cell proliferation	F3 Egr3
0.0734731	4	726	3.88963	Regulation of secretion	Cyp51 Frmd4a S100a8 S100a9
0.0748484	1	14	50.4263	Replicative senescence	Serpine1
0.0748484	2	150	9.4129	Granulocyte migration	S100a8 S100a9
0.0748484	1	14	50.4263	Sphingosine-1-phosphate receptor signaling pathway	S1pr3
0.0748484	1	14	50.4263	Pentose-phosphate shunt	Hsd11b1
0.0748484	1	14	50.4263	NADPH regeneration	Hsd11b1
0.0748484	1	14	50.4263	Copper ion transport	Cp
0.0748484	1	14	50.4263	Response to vitamin E	Hmgcs1
0.0748484	1	14	50.4263	Regulation of development, heterochronic	Serpine2
0.0748484	1	14	50.4263	Positive regulation of striated muscle contraction	Ccn2
0.0748484	1	14	50.4263	Positive regulation of cell growth involved in cardiac muscle cell development	Fdps
0.0748484	1	14	50.4263	Cellular response to follicle-stimulating hormone stimulus	Hmgcs1
0.075953	6	1552	2.72926	Regulation of programmed cell death	Timp1 Aldh1a3 Egr3 Serpine1 S100a8 S100a9
0.0770277	1	15	47.0645	Regulation of trophoblast cell migration	Timp1
0.0770277	1	15	47.0645	Regulation of integrin-mediated signaling pathway	Timp1
0.0770277	1	15	47.0645	Glucocorticoid biosynthetic process	Hsd11b1
0.0770277	6	1564	2.70832	Ion transport	Cp Ccn2 Serpine2 Lcn2 Slco2a1 Trf
0.0770277	3	415	5.10338	Positive regulation of cell projection organization	Serpine2 Lcn2 S100a9
0.0770277	2	158	8.9363	Response to hydrogen peroxide	Lcn2 Hp
0.0770277	1	15	47.0645	Retinal metabolic process	Aldh1a3
0.0770277	5	1133	3.11548	Negative regulation of molecular function	Timp1 Slpi Serpine2 Hp Serpine1
0.0770277	1	15	47.0645	Regulation of retinoic acid receptor signaling pathway	Aldh1a3
0.0770277	4	754	3.74519	Cation homeostasis	Cp Lcn2 Trf C7
0.0770277	1	15	47.0645	Response to UV-A	Timp1
0.0782885	3	422	5.01873	Epithelial cell proliferation	F3 Egr3 Col8a1
0.0805428	1	16	44.123	Inflammatory response to wounding	Timp1
0.0805428	4	767	3.68171	Inorganic ion homeostasis	Cp Lcn2 Trf C7
0.0805428	1	16	44.123	Cerebellar granular layer development	Serpine2
0.0805428	1	16	44.123	Vascular wound healing	Serpine1
0.0805428	1	16	44.123	Trophoblast cell migration	Timp1
0.0812339	2	165	8.55718	Positive regulation of vasculature development	F3 Serpine1
0.0812339	2	165	8.55718	Positive regulation of angiogenesis	F3 Serpine1
0.0818945	2	166	8.50564	Eye morphogenesis	Aldh1a3 Col8a1
0.0821288	1	17	41.5275	Sphingolipid mediated signaling pathway	S1pr3
0.0821288	1	17	41.5275	Regulation of amyloid-beta clearance	Cyp51
0.0821288	2	168	8.40438	Regulation of intrinsic apoptotic signaling pathway	S100a8 S100a9
0.0821288	1	17	41.5275	Toxin metabolic process	Fmo2
0.0821288	1	17	41.5275	Regulation of hydrogen peroxide metabolic process	Hp
0.0821288	1	17	41.5275	Negative regulation of platelet activation	Serpine2
0.0821288	1	17	41.5275	Gamma-delta T cell differentiation	Egr3
0.0821288	1	17	41.5275	Sodium-independent organic anion transport	Slco2a1
0.0821288	1	17	41.5275	Sequestering of metal ion	Lcn2
0.0821288	1	17	41.5275	Cellular response to low-density lipoprotein particle stimulus	Hmgcs1
0.0839122	5	1187	2.97375	Cation transport	Cp Ccn2 Serpine2 Lcn2 Trf
0.0843001	2	172	8.20893	Notch signaling pathway	Hp S1pr3
0.0849543	2	173	8.16148	Liver development	Hp Hmgcs1
0.0853394	1	18	39.2204	Regulation of endothelial cell development	S1pr3
0.0853394	1	18	39.2204	Regulation of establishment of endothelial barrier	S1pr3
0.0853394	1	18	39.2204	Negative regulation of homotypic cell-cell adhesion	Serpine2
0.085748	2	175	8.0682	Negative regulation of secretion by cell	Cyp51 Frmd4a
0.0864001	2	176	8.02236	Hepaticobiliary system development	Hp Hmgcs1
0.0876569	1	19	37.1562	Regulation of sterol biosynthetic process	Fdps
0.0876569	1	19	37.1562	Negative regulation of sodium ion transport	Serpine2
0.0876569	1	19	37.1562	Response to stilbenoid	Saa3
0.0876569	1	19	37.1562	Fibrinolysis	Serpine1
0.0876569	1	19	37.1562	Regulation of cholesterol biosynthetic process	Fdps
0.0876569	1	19	37.1562	Cellular response to cholesterol	Hmgcs1
0.0876569	5	1212	2.91241	Regulation of response to stress	Ccn2 Serpine2 Serpine1 S100a8 S100a9
0.0877439	6	1658	2.55477	Positive regulation of cell communication	Aldh1a3 Ccn2 Serpine2 F3 S100a8 S100a9
0.0877439	4	812	3.47767	Ion homeostasis	Cp Lcn2 Trf C7
0.0891058	6	1665	2.54403	Positive regulation of signaling	Aldh1a3 Ccn2 Serpine2 F3 S100a8 S100a9
0.089918	2	183	7.71549	Tissue remodeling	Timp1 Trf
0.0899549	4	821	3.43955	Cell-cell adhesion	Serpine2 Egr3 S100a8 S100a9
0.0901058	1	20	35.2984	I-kappaB phosphorylation	Saa3
0.0901058	1	20	35.2984	Response to follicle-stimulating hormone	Hmgcs1
0.0901058	1	20	35.2984	Cellular response to gonadotropin stimulus	Hmgcs1
0.0932186	1	21	33.6175	Cellular sodium ion homeostasis	C7
0.0932186	1	21	33.6175	Striatum development	Aldh1a3
0.0932186	1	21	33.6175	Positive regulation of myelination	Trf
0.0932186	1	21	33.6175	Chondrocyte proliferation	Ccn2
0.0932186	1	21	33.6175	Gamma-delta T cell activation	Egr3
0.094781	3	480	4.4123	Negative regulation of transport	Cyp51 Serpine2 Frmd4a
0.0949368	6	1703	2.48726	Small molecule metabolic process	Cyp51 Aldh1a3 Fmo2 Idi1 Fdps Hmgcs1
0.095709	1	22	32.0894	Cartilage condensation	Ccn2
0.095709	1	22	32.0894	Hydrogen peroxide catabolic process	Hp
0.095709	1	22	32.0894	Neural nucleus development	Aldh1a3
0.095709	1	22	32.0894	Regulation of membrane protein ectodomain proteolysis	Timp1
0.095709	1	22	32.0894	Positive regulation of monocyte chemotaxis	Serpine1
0.0959898	6	1714	2.4713	Regulation of cell population proliferation	Timp1 Ccn2 Serpine2 F3 Trf Egr3
0.097572	1	23	30.6942	Copulation	Serpine2
0.097572	1	23	30.6942	Glucocorticoid metabolic process	Hsd11b1
0.097572	1	23	30.6942	Prostaglandin transport	Slco2a1
0.097572	4	857	3.29507	Secretion by cell	Cyp51 Ccn2 Serpine2 Frmd4a
0.097572	1	23	30.6942	Cellular response to sterol	Hmgcs1
0.097572	1	23	30.6942	Positive regulation of bone resorption	Trf
0.097572	3	492	4.30468	Multicellular organismal homeostasis	Ccn2 Lcn2 Trf
0.097572	1	23	30.6942	Regulation of platelet aggregation	Serpine2
0.0975918	2	199	7.09515	Cartilage development	Timp1 Ccn2
0.0996028	3	500	4.23581	Organophosphate biosynthetic process	Idi1 Fdps Hmgcs1
0.0996028	1	24	29.4153	Regulation of platelet-derived growth factor receptor signaling pathway	F3
0.0996028	1	24	29.4153	Chronic inflammatory response	S100a9
0.0996028	1	24	29.4153	Glucose 6-phosphate metabolic process	Hsd11b1
0.0996028	1	24	29.4153	Reflex	Aldh1a3
0.0996028	1	24	29.4153	Angiogenesis involved in wound healing	Serpine1
0.0996028	1	24	29.4153	Neuroepithelial cell differentiation	Serpine1
0.099719	2	204	6.92125	Positive regulation of epithelial cell proliferation	F3 Egr3
0.099719	2	204	6.92125	Negative regulation of secretion	Cyp51 Frmd4a
0.100426	4	876	3.2236	Regulation of response to external stimulus	Serpine2 Serpine1 S100a8 S100a9
0.102602	1	25	28.2387	Steroid catabolic process	Hsd11b1
0.104047	2	210	6.7235	Positive regulation of neuron projection development	Serpine2 S100a9
0.104047	2	210	6.7235	Lung development	Hsd11b1 Ccn2
0.104466	4	890	3.17289	Organophosphate metabolic process	Hsd11b1 Idi1 Fdps Hmgcs1
0.104867	1	26	27.1526	Cell aggregation	Ccn2
0.104867	4	895	3.15516	Positive regulation of intracellular signal transduction	Ccn2 F3 S100a8 S100a9
0.104867	2	213	6.62881	Cell-matrix adhesion	Ccn2 Serpine1
0.104867	1	26	27.1526	Neuromuscular synaptic transmission	Egr3
0.104867	1	26	27.1526	Positive regulation of steroid biosynthetic process	Fdps
0.104867	2	213	6.62881	Respiratory tube development	Hsd11b1 Ccn2
0.105966	4	905	3.1203	Export from cell	Cyp51 Ccn2 Serpine2 Frmd4a
0.105966	1	27	26.147	Positive regulation of alcohol biosynthetic process	Fdps
0.105966	2	215	6.56714	Regulation of cell-substrate adhesion	Serpine1 Col8a1
0.105966	1	27	26.147	Negative regulation of smooth muscle cell migration	Serpine1
0.105966	1	27	26.147	Subpallium development	Aldh1a3
0.105966	1	27	26.147	Retinoic acid metabolic process	Aldh1a3
0.105966	1	27	26.147	Embryonic camera-type eye morphogenesis	Aldh1a3
0.105966	1	27	26.147	Response to lipoprotein particle	Hmgcs1
0.105966	1	27	26.147	Innervation	Serpine2
0.106433	4	907	3.11342	Enzyme linked receptor protein signaling pathway	Ccn2 F3 Trf Nrep
0.10767	1	28	25.2131	Positive regulation of collagen biosynthetic process	Ccn2
0.10767	1	28	25.2131	Regulation of T cell differentiation in thymus	Egr3
0.10767	1	28	25.2131	Endothelial cell chemotaxis	Egr3
0.10767	1	28	25.2131	Negative regulation of oxidoreductase activity	Hp
0.10767	1	28	25.2131	Regulation of cell growth involved in cardiac muscle cell development	Fdps
0.10767	1	28	25.2131	Regulation of monocyte chemotaxis	Serpine1
0.108364	2	222	6.36007	Reactive oxygen species metabolic process	Ccn2 Hp
0.108983	2	223	6.33155	Regulation of endocytosis	Trf Serpine1
0.109338	2	224	6.30328	Extrinsic apoptotic signaling pathway	Lcn2 Serpine1
0.109338	2	224	6.30328	Response to reactive oxygen species	Lcn2 Hp
0.109828	1	29	24.3437	Negative regulation of endothelial cell apoptotic process	Serpine1
0.109828	3	540	3.92204	Endocytosis	Prg4 Trf Serpine1
0.111654	1	30	23.5323	Negative regulation of extrinsic apoptotic signaling pathway via death domain receptors	Serpine1
0.111654	2	228	6.1927	Receptor-mediated endocytosis	Trf Serpine1
0.111654	1	30	23.5323	Positive regulation of collagen metabolic process	Ccn2
0.111654	1	30	23.5323	Retinoic acid receptor signaling pathway	Aldh1a3
0.111654	3	547	3.87185	Regulation of cell development	Serpine2 Trf S1pr3
0.111654	1	30	23.5323	Response to cholesterol	Hmgcs1
0.111654	1	30	23.5323	Cellular response to lipoprotein particle stimulus	Hmgcs1
0.112229	3	549	3.85775	Regulation of defense response	Serpine1 S100a8 S100a9
0.114753	1	31	22.7732	Response to gonadotropin	Hmgcs1
0.117543	1	32	22.0615	Complement activation, classical pathway	C7
0.117543	1	32	22.0615	Cytolysis	C7
0.117543	1	32	22.0615	Regulation of astrocyte differentiation	Serpine2
0.117552	3	562	3.76851	Regulation of cell activation	Ccn2 Serpine2 Egr3
0.118313	2	239	5.90768	Regulation of peptide secretion	S100a8 S100a9
0.118927	2	240	5.88306	Negative regulation of cellular catabolic process	Timp1 Hp
0.11954	2	241	5.85865	Regulation of peptide transport	S100a8 S100a9
0.119731	1	33	21.393	Response to copper ion	Cp
0.120849	3	571	3.70911	Positive regulation of apoptotic process	Aldh1a3 S100a8 S100a9
0.121034	1	34	20.7638	Amyloid-beta clearance	Cyp51
0.121034	1	34	20.7638	Regulation of platelet activation	Serpine2
0.121034	1	34	20.7638	Regulation of homotypic cell-cell adhesion	Serpine2
0.121034	1	34	20.7638	Response to sterol	Hmgcs1
0.121034	1	34	20.7638	Negative regulation of smoothened signaling pathway	Serpine2
0.121034	1	34	20.7638	Establishment of epithelial cell polarity	Frmd4a
0.121034	1	34	20.7638	Regulation of cholesterol metabolic process	Fdps
0.121211	2	246	5.73958	Regulation of muscle system process	Ccn2 Fdps
0.121819	2	247	5.71634	Tissue homeostasis	Ccn2 Trf
0.122167	4	978	2.88739	Cell activation	Timp1 Ccn2 Serpine2 Egr3
0.123388	1	35	20.1705	Secretory granule organization	Serpine2
0.124582	5	1438	2.45469	Positive regulation of signal transduction	Aldh1a3 Ccn2 F3 S100a8 S100a9
0.124582	1	36	19.6102	Response to iron ion	Trf
0.124582	1	36	19.6102	Positive regulation of cardiac muscle hypertrophy	Fdps
0.124582	1	36	19.6102	Negative regulation of cell-matrix adhesion	Serpine1
0.124582	3	586	3.61417	Positive regulation of programmed cell death	Aldh1a3 S100a8 S100a9
0.124582	4	987	2.86106	Cellular lipid metabolic process	Aldh1a3 Idi1 Fdps Hmgcs1
0.124582	1	36	19.6102	Positive regulation of steroid metabolic process	Fdps
0.124582	1	36	19.6102	Embryonic eye morphogenesis	Aldh1a3
0.127112	1	37	19.0802	Acetyl-CoA metabolic process	Hmgcs1
0.127112	1	37	19.0802	Positive regulation of muscle hypertrophy	Fdps
0.127112	1	37	19.0802	Cellular carbohydrate catabolic process	Hsd11b1
0.129397	2	260	5.43052	Multi-multicellular organism process	Timp1 Serpine2
0.131418	3	604	3.50646	Regulation of system process	Ccn2 Trf Fdps
0.132634	3	607	3.48913	Cellular metal ion homeostasis	Lcn2 Trf C7
0.132634	1	39	18.1017	Positive regulation of cardiac muscle tissue growth	Fdps
0.13506	1	40	17.6492	Cerebellar cortex morphogenesis	Serpine2
0.13506	1	40	17.6492	Embryonic camera-type eye development	Aldh1a3
0.13506	1	40	17.6492	Regulation of endothelial cell differentiation	S1pr3
0.136326	4	1029	2.74429	Negative regulation of cellular protein metabolic process	Timp1 Slpi Serpine2 Serpine1
0.136861	1	41	17.2187	Positive regulation of heart contraction	Ccn2
0.136861	2	271	5.21009	Positive regulation of neurogenesis	Serpine2 Trf
0.136861	4	1032	2.73631	Negative regulation of multicellular organismal process	Timp1 Cyp51 Serpine2 Serpine1
0.136861	1	41	17.2187	Positive regulation of heart growth	Fdps
0.138326	4	1041	2.71265	Animal organ morphogenesis	Aldh1a3 Ccn2 Serpine1 Col8a1
0.138326	1	42	16.8088	Endodermal cell differentiation	Col8a1
0.138326	1	42	16.8088	Cell growth involved in cardiac muscle cell development	Fdps
0.138326	2	274	5.15305	Connective tissue development	Timp1 Ccn2
0.138326	1	42	16.8088	Physiological muscle hypertrophy	Fdps
0.138326	1	42	16.8088	Physiological cardiac muscle hypertrophy	Fdps
0.138379	2	276	5.11571	Negative regulation of cell migration	Timp1 Serpine1
0.139635	5	1507	2.3423	Regulation of intracellular signal transduction	Ccn2 Serpine2 F3 S100a8 S100a9
0.140337	1	43	16.4179	Membrane protein ectodomain proteolysis	Timp1
0.140337	1	43	16.4179	Detection of mechanical stimulus involved in sensory perception	Serpine2
0.143203	1	44	16.0447	Positive regulation of blood circulation	Ccn2
0.144003	2	284	4.9716	Negative regulation of cell adhesion	Serpine2 Serpine1
0.144543	2	285	4.95416	Sensory organ morphogenesis	Aldh1a3 Col8a1
0.144543	2	286	4.93684	Extracellular matrix organization	Ccn2 Col8a1
0.144543	1	45	15.6882	Regulation of collagen biosynthetic process	Ccn2
0.144543	1	45	15.6882	Humoral immune response mediated by circulating immunoglobulin	C7
0.144543	1	45	15.6882	Response to mineralocorticoid	Ccn2
0.144872	2	287	4.91964	External encapsulating structure organization	Ccn2 Col8a1
0.145459	2	288	4.90255	Extracellular structure organization	Ccn2 Col8a1
0.145736	2	290	4.86874	Negative regulation of cell motility	Timp1 Serpine1
0.145736	1	46	15.3471	Regulation of cell adhesion mediated by integrin	Serpine1
0.145736	2	289	4.88559	Regulation of angiogenesis	F3 Serpine1
0.145736	2	289	4.88559	Regulation of protein secretion	Cyp51 Frmd4a
0.145736	2	290	4.86874	Peptide secretion	S100a8 S100a9
0.14632	2	291	4.85201	Intrinsic apoptotic signaling pathway	S100a8 S100a9
0.147412	2	293	4.81889	Regulation of vasculature development	F3 Serpine1
0.147412	1	47	15.0206	Retinol metabolic process	Aldh1a3
0.147412	1	47	15.0206	Establishment of endothelial barrier	S1pr3
0.148942	1	48	14.7077	Regulation of extrinsic apoptotic signaling pathway via death domain receptors	Serpine1
0.148942	1	48	14.7077	Cerebellum morphogenesis	Serpine2
0.148942	1	48	14.7077	Negative regulation of epithelial cell differentiation	S1pr3
0.148942	1	48	14.7077	Regulation of bone resorption	Trf
0.148942	1	48	14.7077	Positive regulation of muscle contraction	Ccn2
0.150492	1	49	14.4075	Regulation of alcohol biosynthetic process	Fdps
0.150492	1	49	14.4075	Positive regulation of glial cell differentiation	Serpine2
0.150492	2	300	4.70645	Negative regulation of cellular component movement	Timp1 Serpine1
0.150492	2	299	4.72219	Anatomical structure homeostasis	Ccn2 Trf
0.150492	3	666	3.18003	Cellular response to growth factor stimulus	Ccn2 Egr3 Nrep
0.151011	1	50	14.1194	Negative regulation of epithelial cell apoptotic process	Serpine1
0.151011	1	50	14.1194	Negative regulation of reactive oxygen species metabolic process	Hp
0.151011	1	50	14.1194	Regulation of collagen metabolic process	Ccn2
0.151011	3	671	3.15634	Cellular cation homeostasis	Lcn2 Trf C7
0.151011	1	50	14.1194	Positive regulation of epithelial cell differentiation	Serpine1
0.151011	1	50	14.1194	Positive regulation of nervous system process	Trf
0.151011	4	1100	2.56716	Negative regulation of cell death	Timp1 Ccn2 Egr3 Serpine1
0.151011	1	50	14.1194	Platelet aggregation	Serpine2
0.153032	1	51	13.8425	Endoderm formation	Col8a1
0.153032	1	51	13.8425	Hindbrain morphogenesis	Serpine2
0.153032	1	51	13.8425	Hydrogen peroxide metabolic process	Hp
0.154134	1	52	13.5763	Regulation of endothelial cell apoptotic process	Serpine1
0.154134	1	52	13.5763	Complement activation	C7
0.154134	1	52	13.5763	Mating	Serpine2
0.154134	1	52	13.5763	Cell migration involved in sprouting angiogenesis	Egr3
0.154134	1	52	13.5763	Regulation of chondrocyte differentiation	Ccn2
0.154134	1	52	13.5763	Face development	Aldh1a3
0.154801	3	684	3.09635	Cellular ion homeostasis	Lcn2 Trf C7
0.155131	2	312	4.52543	Peptide transport	S100a8 S100a9
0.155798	1	53	13.3201	Negative regulation of viral genome replication	Slpi
0.155798	1	53	13.3201	Positive regulation of organ growth	Fdps
0.156834	5	1606	2.19791	Response to endogenous stimulus	Timp1 Ccn2 Egr3 Nrep Hmgcs1
0.157136	2	316	4.46815	Response to light stimulus	Timp1 Hmgcs1
0.157136	1	54	13.0735	Collagen biosynthetic process	Ccn2
0.157136	1	54	13.0735	Detection of mechanical stimulus	Serpine2
0.157136	1	54	13.0735	Protein homotetramerization	Aldh1a3
0.157483	3	694	3.05173	Response to growth factor	Ccn2 Egr3 Nrep
0.159039	1	55	12.8358	Positive regulation of striated muscle cell differentiation	Fdps
0.159039	1	55	12.8358	Endothelial cell apoptotic process	Serpine1
0.159432	4	1140	2.47708	Positive regulation of gene expression	Ccn2 Lcn2 F3 Serpine1
0.159432	3	703	3.01266	Regulation of cytokine production	F3 Serpine1 S1pr3
0.159432	3	700	3.02558	Actin cytoskeleton organization	Ccn2 Trf S100a9
0.159432	1	56	12.6066	Axon regeneration	Nrep
0.159432	1	56	12.6066	Regulation of myelination	Trf
0.159432	1	56	12.6066	Membrane protein proteolysis	Timp1
0.159432	2	323	4.37132	Negative regulation of locomotion	Timp1 Serpine1
0.159432	1	56	12.6066	Regulation of carbohydrate catabolic process	Hsd11b1
0.161573	1	57	12.3854	Regulation of bone remodeling	Trf
0.161573	1	57	12.3854	Icosanoid transport	Slco2a1
0.162174	3	710	2.98296	Cytokine production	F3 Serpine1 S1pr3
0.162316	2	328	4.30468	Positive regulation of nervous system development	Serpine2 Trf
0.163097	1	58	12.1719	Positive regulation of stress fiber assembly	Ccn2
0.163097	1	58	12.1719	Sodium ion homeostasis	C7
0.164595	1	59	11.9656	Cellular aldehyde metabolic process	Aldh1a3
0.164595	3	718	2.94973	Regulation of cell projection organization	Serpine2 Lcn2 S100a9
0.164595	1	59	11.9656	Monocyte chemotaxis	Serpine1
0.164595	4	1164	2.42601	Epithelium development	Aldh1a3 Serpine2 Serpine1 S1pr3
0.165332	2	334	4.22735	Positive regulation of cell activation	Ccn2 Egr3
0.165882	2	335	4.21473	ERK1 and ERK2 cascade	Ccn2 Trf
0.166068	1	60	11.7661	Cellular response to vascular endothelial growth factor stimulus	Egr3
0.166068	1	60	11.7661	Platelet-derived growth factor receptor signaling pathway	F3
0.166409	4	1173	2.40739	Response to abiotic stimulus	Timp1 Ccn2 Serpine2 Hmgcs1
0.167816	1	61	11.5732	Negative regulation of cell-substrate adhesion	Serpine1
0.167816	1	61	11.5732	Secondary metabolic process	Fmo2
0.169844	1	62	11.3866	Embryo implantation	Timp1
0.169844	1	62	11.3866	Cerebellar cortex development	Serpine2
0.17196	2	345	4.09257	Positive regulation of cell development	Serpine2 Trf
0.172315	3	739	2.8659	Regulation of cellular catabolic process	Timp1 Hsd11b1 Hp
0.173826	2	349	4.04566	Transmembrane receptor protein serine/threonine kinase signaling pathway	Trf Nrep
0.173826	2	348	4.05729	Amide transport	S100a8 S100a9
0.173826	2	349	4.04566	Camera-type eye development	Aldh1a3 Col8a1
0.173826	1	64	11.0307	Neuromuscular process controlling balance	Aldh1a3
0.175511	1	65	10.861	Neuron projection regeneration	Nrep
0.177777	1	66	10.6965	Positive chemotaxis	Saa3
0.178056	4	1211	2.33185	Positive regulation of catalytic activity	Ccn2 F3 S100a8 S100a9
0.179388	2	357	3.955	Regulation of epithelial cell proliferation	F3 Egr3
0.179403	1	67	10.5368	Positive regulation of neural precursor cell proliferation	Trf
0.17951	3	758	2.79407	Brain development	Aldh1a3 Serpine2 Hmgcs1
0.18013	1	68	10.3819	Regulation of cardiac muscle hypertrophy	Fdps
0.18013	1	68	10.3819	Endothelial cell development	S1pr3
0.18013	1	68	10.3819	Positive regulation of actin filament bundle assembly	Ccn2
0.18013	4	1222	2.31086	Chemical homeostasis	Cp Lcn2 Trf C7
0.18013	1	68	10.3819	Demethylation	Cyp51
0.181338	1	69	10.2314	Negative regulation of reproductive process	Timp1
0.181338	1	69	10.2314	Cell adhesion mediated by integrin	Serpine1
0.181338	1	69	10.2314	Response to fatty acid	Ccn2
0.181338	1	69	10.2314	Positive regulation of mononuclear cell migration	Serpine1
0.18157	2	364	3.87894	Negative regulation of response to external stimulus	Serpine2 Serpine1
0.184128	1	71	9.94321	Retinoid metabolic process	Aldh1a3
0.184128	1	71	9.94321	Regulation of muscle hypertrophy	Fdps
0.184128	1	71	9.94321	Positive regulation of muscle cell differentiation	Fdps
0.184128	1	71	9.94321	Regulation of cardiac muscle tissue growth	Fdps
0.184128	1	71	9.94321	Regulation of cardiac muscle contraction	Ccn2
0.184128	1	71	9.94321	Regulation of cartilage development	Ccn2
0.185277	2	371	3.80576	Protein secretion	Cyp51 Frmd4a
0.185336	1	72	9.80511	Peripheral nervous system development	Egr3
0.185336	2	372	3.79553	Establishment of protein localization to extracellular region	Cyp51 Frmd4a
0.185336	1	72	9.80511	Regulation of synaptic transmission, glutamatergic	Serpine2
0.186838	1	73	9.67079	Fibroblast growth factor receptor signaling pathway	Ccn2
0.186838	3	784	2.70141	Actin filament-based process	Ccn2 Trf S100a9
0.186838	1	73	9.67079	Production of molecular mediator involved in inflammatory response	Serpine1
0.187695	1	74	9.5401	Adenylate cyclase-inhibiting G protein-coupled receptor signaling pathway	S1pr3
0.187695	1	74	9.5401	Regulation of tissue remodeling	Trf
0.187695	1	74	9.5401	Homotypic cell-cell adhesion	Serpine2
0.187695	1	74	9.5401	Bone resorption	Trf
0.187695	1	74	9.5401	Regulation of steroid biosynthetic process	Fdps
0.187904	5	1765	1.99991	Neurogenesis	Serpine2 Trf Nrep S100a8 S100a9
0.187904	2	379	3.72542	Protein localization to extracellular region	Cyp51 Frmd4a
0.191551	1	76	9.28905	Regulation of heart growth	Fdps
0.193301	1	77	9.16841	Extrinsic apoptotic signaling pathway via death domain receptors	Serpine1
0.193301	1	77	9.16841	Diterpenoid metabolic process	Aldh1a3
0.193673	2	388	3.63901	Response to metal ion	Cp Trf
0.193673	5	1787	1.97529	Homeostatic process	Cp Ccn2 Lcn2 Trf C7
0.193673	3	805	2.63094	Head development	Aldh1a3 Serpine2 Hmgcs1
0.19376	1	78	9.05087	Extrinsic apoptotic signaling pathway in absence of ligand	Lcn2
0.19376	1	78	9.05087	Nerve development	Serpine2
0.19376	1	78	9.05087	Signal transduction in absence of ligand	Lcn2
0.199412	2	397	3.55651	Eye development	Aldh1a3 Col8a1
0.199412	3	818	2.58912	Positive regulation of immune system process	Egr3 Serpine1 C7
0.199826	1	81	8.71565	Regulation of viral genome replication	Slpi
KO Female v KO Male: Over-represented pathways in KO Female
Enrichment FDR	nGenes	Pathway Genes	Fold Enrichment	Pathway	Genes
4.24707e-08	4	9	347.381	Haptoglobin binding	Hbb-bs Hba-a2 Hba-a1 Hbb-bt
1.2008e-07	4	13	240.495	Oxygen carrier activity	Hbb-bs Hba-a2 Hba-a1 Hbb-bt
1.40148e-06	4	25	125.057	Oxygen binding	Hbb-bs Hba-a2 Hba-a1 Hbb-bt
2.37406e-05	4	53	58.9892	Peroxidase activity	Hbb-bs Hba-a2 Hba-a1 Hbb-bt
2.55303e-05	4	57	54.8496	Oxidoreductase activity, acting on peroxide as acceptor	Hbb-bs Hba-a2 Hba-a1 Hbb-bt
2.72694e-05	5	145	26.952	Organic acid binding	P4ha3 Hbb-bs Hba-a2 Hba-a1 Hbb-bt
3.2581e-05	2	2	781.607	Hemoglobin beta binding	Hbb-bs Hbb-bt
3.2581e-05	4	68	45.9769	Molecular carrier activity	Hbb-bs Hba-a2 Hba-a1 Hbb-bt
7.0938e-05	4	85	36.7815	Antioxidant activity	Hbb-bs Hba-a2 Hba-a1 Hbb-bt
0.000248813	2	5	312.643	Hemoglobin alpha binding	Hbb-bs Hbb-bt
0.000289177	9	1285	5.47429	DNA-binding transcription factor activity, RNA polymerase II-specific	Hoxa10 Hoxc11 Zim1 Plagl1 Pitx1 Hoxc10 Pgr Hoxa11 Hoxd11
0.000378357	6	499	9.39808	DNA-binding transcription activator activity	Hoxa10 Hoxc11 Plagl1 Pitx1 Hoxc10 Pgr
0.000378357	6	492	9.53179	DNA-binding transcription activator activity, RNA polymerase II-specific	Hoxa10 Hoxc11 Plagl1 Pitx1 Hoxc10 Pgr
0.000378357	9	1365	5.15345	DNA-binding transcription factor activity	Hoxa10 Hoxc11 Zim1 Plagl1 Pitx1 Hoxc10 Pgr Hoxa11 Hoxd11
0.000558058	8	1110	5.6332	RNA polymerase II cis-regulatory region sequence-specific DNA binding	Hoxa10 Hoxc11 Zim1 Plagl1 Pitx1 Hoxc10 Pgr Hoxa11
0.000558058	2	9	173.69	Hemoglobin binding	Hbb-bs Hbb-bt
0.000570668	8	1132	5.52373	Cis-regulatory region sequence-specific DNA binding	Hoxa10 Hoxc11 Zim1 Plagl1 Pitx1 Hoxc10 Pgr Hoxa11
0.000577356	9	1493	4.71163	Sequence-specific double-stranded DNA binding	Hoxa10 Hoxc11 Zim1 Plagl1 Pitx1 Hoxc10 Pgr Hoxa11 Hoxd11
0.00068847	4	183	17.0843	Heme binding	Hbb-bs Hba-a2 Hba-a1 Hbb-bt
0.000750005	9	1575	4.46633	Double-stranded DNA binding	Hoxa10 Hoxc11 Zim1 Plagl1 Pitx1 Hoxc10 Pgr Hoxa11 Hoxd11
0.000750005	4	192	16.2835	Tetrapyrrole binding	Hbb-bs Hba-a2 Hba-a1 Hbb-bt
0.000773424	9	1591	4.42141	Sequence-specific DNA binding	Hoxa10 Hoxc11 Zim1 Plagl1 Pitx1 Hoxc10 Pgr Hoxa11 Hoxd11
0.0012609	8	1324	4.7227	RNA polymerase II transcription regulatory region sequence-specific DNA binding	Hoxa10 Hoxc11 Zim1 Plagl1 Pitx1 Hoxc10 Pgr Hoxa11
0.00174884	9	1791	3.92767	Transcription regulator activity	Hoxa10 Hoxc11 Zim1 Plagl1 Pitx1 Hoxc10 Pgr Hoxa11 Hoxd11
0.00183772	8	1420	4.40342	Transcription cis-regulatory region binding	Hoxa10 Hoxc11 Zim1 Plagl1 Pitx1 Hoxc10 Pgr Hoxa11
0.00183772	8	1424	4.39105	Transcription regulatory region nucleic acid binding	Hoxa10 Hoxc11 Zim1 Plagl1 Pitx1 Hoxc10 Pgr Hoxa11
0.00284016	6	814	5.76123	Oxidoreductase activity	Akr1c14 P4ha3 Hbb-bs Hba-a2 Hba-a1 Hbb-bt
0.0040479	2	31	50.4263	Fibronectin binding	Igfbp3 Myoc
0.0132011	3	211	11.1129	Iron ion binding	P4ha3 Hba-a2 Hba-a1
0.0134682	1	2	390.804	Protein tyrosine phosphatase activator activity	Igfbp3
0.0195385	1	3	260.536	Preprotein binding	Ngfr
0.0244574	1	4	195.402	Pancreatic polypeptide receptor activity	Npy1r
0.0244574	1	4	195.402	Amino acid:proton symporter activity	Slc36a2
0.0288071	1	5	156.321	Peptide YY receptor activity	Npy1r
0.0288071	1	5	156.321	Procollagen-proline 4-dioxygenase activity	P4ha3
0.0335875	1	6	130.268	Neurotrophin TRKA receptor binding	Ngfr
0.0365958	1	8	97.7009	Neurotrophin TRK receptor binding	Ngfr
0.0365958	1	8	97.7009	Axon guidance receptor activity	Robo2
0.0365958	1	8	97.7009	L-proline transmembrane transporter activity	Slc36a2
0.0365958	1	8	97.7009	Procollagen-proline dioxygenase activity	P4ha3
0.0365958	1	8	97.7009	Peptidyl-proline 4-dioxygenase activity	P4ha3
0.0365958	1	8	97.7009	Insulin-like growth factor II binding	Igfbp3
0.0365958	1	7	111.658	Myosin light chain binding	Myoc
0.0365958	6	1457	3.2187	Protein-containing complex binding	Ngfr Dlgap1 Hbb-bs Hba-a2 Hba-a1 Hbb-bt
0.0385186	1	9	86.8452	L-alanine transmembrane transporter activity	Slc36a2
0.0385186	1	9	86.8452	Glycine transmembrane transporter activity	Slc36a2
0.0385186	1	9	86.8452	Nerve growth factor binding	Ngfr
0.0402058	1	10	78.1607	Death receptor activity	Ngfr
0.0402058	1	10	78.1607	Ketosteroid monooxygenase activity	Akr1c14
0.0402058	1	10	78.1607	Structural constituent of postsynaptic density	Dlgap1
0.0422697	1	12	65.1339	Neuropeptide Y receptor activity	Npy1r
0.0422697	2	147	10.6341	Growth factor binding	Ngfr Igfbp3
0.0422697	1	12	65.1339	Alanine transmembrane transporter activity	Slc36a2
0.0422697	1	12	65.1339	Peptidyl-proline dioxygenase activity	P4ha3
0.0422697	1	12	65.1339	Insulin-like growth factor I binding	Igfbp3
0.0422697	1	12	65.1339	Protein phosphatase activator activity	Igfbp3
0.0422697	1	12	65.1339	Structural constituent of postsynaptic specialization	Dlgap1
0.0442127	1	13	60.1236	Bile acid binding	Akr1c14
0.0442127	1	13	60.1236	Neurotrophin binding	Ngfr
0.0452819	1	14	55.8291	Neurotrophin receptor binding	Ngfr
0.0452819	1	14	55.8291	Phosphatase activator activity	Igfbp3
0.0452819	1	14	55.8291	Androsterone dehydrogenase activity	Akr1c14
0.0520326	2	174	8.98399	Carboxylic acid binding	Akr1c14 P4ha3
0.0531686	1	17	45.9769	Solute:proton symporter activity	Slc36a2
0.0537424	1	18	43.4226	Steroid hormone receptor activity	Pgr
0.0537424	1	18	43.4226	Alditol:NADP+ 1-oxidoreductase activity	Akr1c14
0.0537424	1	18	43.4226	Amino acid:cation symporter activity	Slc36a2
0.0558594	1	19	41.1372	L-ascorbic acid binding	P4ha3
0.0607698	1	21	37.2194	D-threo-aldose 1-dehydrogenase activity	Akr1c14
0.0627155	1	22	35.5276	Structural constituent of postsynapse	Dlgap1
0.0701344	1	25	31.2643	Coreceptor activity	Ngfr
0.0714716	2	222	7.04151	Oxidoreductase activity, acting on paired donors, with incorporation or reduction of molecular oxygen	Akr1c14 P4ha3
0.0716174	1	27	28.9484	Alcohol dehydrogenase (NADP+) activity	Akr1c14
0.0716174	1	27	28.9484	Oxidoreductase activity, acting on single donors with incorporation of molecular oxygen, incorporation of two atoms of oxygen	P4ha3
0.0716174	1	27	28.9484	Wnt-protein binding	Frzb
0.0722964	1	28	27.9145	Insulin-like growth factor binding	Igfbp3
0.0722964	1	28	27.9145	Oxidoreductase activity, acting on single donors with incorporation of molecular oxygen	P4ha3
0.0763735	1	30	26.0536	Aldo-keto reductase (NADP) activity	Akr1c14
0.0778724	1	31	25.2131	Structural constituent of synapse	Dlgap1
0.0887397	4	1064	2.93837	Transition metal ion binding	Pgr P4ha3 Hba-a2 Hba-a1
0.0903165	1	37	21.1245	Neutral amino acid transmembrane transporter activity	Slc36a2
0.0942946	2	278	5.62307	Carbohydrate binding	P4ha3 Cntn1
0.0951116	1	40	19.5402	Frizzled binding	Myoc
0.0951372	1	41	19.0636	Steroid dehydrogenase activity, acting on the CH-OH group of donors, NAD or NADP as acceptor	Akr1c14
0.0951372	1	41	19.0636	Mitogen-activated protein kinase binding	Ptpn5
0.0962654	1	42	18.6097	Neuropeptide receptor activity	Npy1r
0.101769	1	45	17.369	Phosphotyrosine residue binding	Ptpn5
0.104742	1	48	16.2835	Nuclear receptor activity	Pgr
0.104742	1	48	16.2835	Steroid dehydrogenase activity	Akr1c14
0.104742	1	48	16.2835	Ligand-activated transcription factor activity	Pgr
0.105685	1	49	15.9512	Oxidoreductase activity, acting on paired donors, with incorporation or reduction of molecular oxygen, NAD(P)H as one donor, and incorporation of one atom of oxygen	Akr1c14
0.106604	1	50	15.6321	2-oxoglutarate-dependent dioxygenase activity	P4ha3
0.121734	1	58	13.476	Protein phosphorylated amino acid binding	Ptpn5
0.122441	1	59	13.2476	L-amino acid transmembrane transporter activity	Slc36a2
0.12313	1	60	13.0268	Amyloid-beta binding	Ngfr
0.127706	1	63	12.4065	Glutamate receptor binding	Ptpn5
0.147843	1	75	10.4214	Myosin binding	Myoc
0.147843	1	75	10.4214	Receptor tyrosine kinase binding	Myoc
0.154075	1	80	9.77009	Protein phosphatase regulator activity	Igfbp3
0.154075	1	80	9.77009	Monocarboxylic acid binding	Akr1c14
0.154642	1	82	9.53179	Amino acid transmembrane transporter activity	Slc36a2
0.154642	1	82	9.53179	Monosaccharide binding	P4ha3
0.158454	1	85	9.19538	Hormone binding	Pgr
0.165657	1	90	8.68452	Dioxygenase activity	P4ha3
0.165802	1	91	8.58909	Solute:cation symporter activity	Slc36a2
0.167644	1	93	8.40438	Phosphatase regulator activity	Igfbp3
0.175357	1	99	7.89502	Protein tyrosine phosphatase activity	Ptpn5
0.175357	4	1502	2.08151	Signaling receptor binding	Ngfr Myoc Ptpn5 Pgr
0.175357	1	100	7.81607	ATPase binding	Pgr
0.175357	1	101	7.73868	Phosphoprotein binding	Ptpn5
0.179439	1	105	7.44388	Protein tyrosine kinase binding	Myoc
0.192031	1	114	6.8562	Steroid binding	Pgr
KO Female v KO Male: Over-represented pathways in KO Male
Enrichment FDR	nGenes	Pathway Genes	Fold Enrichment	Pathway	Genes
8.96141e-08	7	136	36.3366	Extracellular matrix structural constituent	Aspn Srpx2 Col4a5 Col4a2 Prelp Hmcn2 Col8a1
3.34767e-06	6	147	28.815	Heparin binding	Ccn2 Smoc2 Serpine2 Pf4 Sfrp1 Prelp
1.46456e-05	6	202	20.9693	Glycosaminoglycan binding	Ccn2 Smoc2 Serpine2 Pf4 Sfrp1 Prelp
4.28612e-05	6	255	16.611	Sulfur compound binding	Ccn2 Smoc2 Serpine2 Pf4 Sfrp1 Prelp
0.000397726	7	612	8.07479	Structural molecule activity	Aspn Srpx2 Col4a5 Col4a2 Prelp Hmcn2 Col8a1
0.000397726	3	35	60.5115	Extracellular matrix structural constituent conferring tensile strength	Col4a5 Col4a2 Col8a1
0.000472889	10	1502	4.70018	Signaling receptor binding	S100a4 Ccn2 Ace Gdf10 Serpine2 Pf4 Adm Srpx2 Sfrp1 Trf
0.00200077	2	12	117.661	Extracellular matrix structural constituent conferring compression resistance	Aspn Prelp
0.0118158	4	303	9.31971	G protein-coupled receptor binding	Ace Pf4 Adm Sfrp1
0.0273806	1	2	352.984	11-beta-hydroxysteroid dehydrogenase [NAD(P)] activity	Hsd11b1
0.0273806	3	206	10.2811	Endopeptidase inhibitor activity	Slpi Serpine2 Cst3
0.0273806	5	709	4.97862	Calcium ion binding	S100a4 Aspn Smoc2 Svep1 Hmcn2
0.0273806	1	2	352.984	Iron chaperone activity	Trf
0.0273806	2	55	25.6716	NADP binding	Hsd11b1 Fmo2
0.0281422	1	3	235.323	Tripeptidyl-peptidase activity	Ace
0.0281422	1	3	235.323	Peptidyl-dipeptidase activity	Ace
0.0281422	3	214	9.89674	Peptidase inhibitor activity	Slpi Serpine2 Cst3
0.0281422	1	3	235.323	Bradykinin receptor binding	Ace
0.0281422	3	221	9.58327	Endopeptidase regulator activity	Slpi Serpine2 Cst3
0.0286518	5	814	4.33641	Oxidoreductase activity	Cp Hsd11b1 Cyp1b1 Fmo2 Aldh1a1
0.0286518	1	4	176.492	Benzaldehyde dehydrogenase (NAD+) activity	Aldh1a1
0.0286518	4	513	5.50462	Signaling receptor activator activity	Ccn2 Gdf10 Pf4 Adm
0.0286518	4	508	5.5588	Receptor ligand activity	Ccn2 Gdf10 Pf4 Adm
0.0286518	1	4	176.492	CXCR3 chemokine receptor binding	Pf4
0.0286518	3	255	8.3055	Peptidase regulator activity	Slpi Serpine2 Cst3
0.0342288	1	5	141.194	Benzaldehyde dehydrogenase [NAD(P)+] activity	Aldh1a1
0.0351218	4	556	5.0789	Signaling receptor regulator activity	Ccn2 Gdf10 Pf4 Adm
0.0431763	1	9	78.4409	Retinal dehydrogenase activity	Aldh1a1
0.0431763	1	8	88.246	3-chloroallyl aldehyde dehydrogenase activity	Aldh1a1
0.0431763	1	9	78.4409	N,N-dimethylaniline monooxygenase activity	Fmo2
0.0431763	2	120	11.7661	Serine-type endopeptidase inhibitor activity	Slpi Serpine2
0.0431763	1	8	88.246	Metallochaperone activity	Trf
0.0431763	1	9	78.4409	Hemoglobin binding	Hp
0.0431763	1	8	88.246	RAGE receptor binding	S100a4
0.0431763	1	9	78.4409	Serine-type exopeptidase activity	Ace
0.0431763	1	8	88.246	Metallodipeptidase activity	Ace
0.0431763	1	7	100.853	Hydroperoxy icosatetraenoate dehydratase activity	Cyp1b1
0.0460128	7	1869	2.64407	Molecular function regulator	Slpi Ccn2 Gdf10 Serpine2 Cst3 Pf4 Adm
0.0489203	4	688	4.10446	Peptidase activity	Slpi Ace Sfrp1 Hp
0.0489203	1	11	64.1789	Transferrin receptor binding	Trf
0.0490248	5	1064	3.31752	Transition metal ion binding	S100a4 Cp Ace Cyp1b1 Trf
0.0491785	1	13	54.3052	Ferroxidase activity	Cp
0.0491785	1	13	54.3052	Oxidoreductase activity, acting on metal ions, oxygen as acceptor	Cp
0.0491785	2	147	9.605	Growth factor binding	Ccn2 Srpx2
0.0491785	1	12	58.8306	Chloride ion binding	Ace
0.0491785	1	13	54.3052	CXCR chemokine receptor binding	Pf4
0.0491785	1	12	58.8306	Estrogen 16-alpha-hydroxylase activity	Cyp1b1
0.0493913	2	149	9.47608	Growth factor activity	Ccn2 Gdf10
0.054115	1	15	47.0645	Dipeptidase activity	Ace
0.0543553	1	16	44.123	Aldehyde dehydrogenase (NAD+) activity	Aldh1a1
0.0543553	2	161	8.76979	Monooxygenase activity	Cyp1b1 Fmo2
0.0543553	1	16	44.123	Mitogen-activated protein kinase kinase binding	Ace
0.0588044	1	18	39.2204	Aldehyde dehydrogenase [NAD(P)+] activity	Aldh1a1
0.0588044	1	18	39.2204	Ferric iron binding	Trf
0.0672199	1	21	33.6175	Oxidoreductase activity, acting on metal ions	Cp
0.0687548	3	484	4.37583	Endopeptidase activity	Ace Sfrp1 Hp
0.0791784	2	211	6.69164	Iron ion binding	Cyp1b1 Trf
0.0798332	1	28	25.2131	Insulin-like growth factor binding	Ccn2
0.0798332	2	216	6.53674	Serine-type peptidase activity	Ace Hp
0.0798332	2	222	6.36007	Oxidoreductase activity, acting on paired donors, with incorporation or reduction of molecular oxygen	Cyp1b1 Fmo2
0.0798332	1	27	26.147	Wnt-protein binding	Sfrp1
0.0798332	2	221	6.38885	Serine hydrolase activity	Ace Hp
0.0860397	1	31	22.7732	Fibronectin binding	Ccn2
0.08634	2	238	5.9325	Cytokine activity	Gdf10 Pf4
0.08634	1	32	22.0615	Ferrous iron binding	Trf
0.0950511	1	36	19.6102	Aromatase activity	Cyp1b1
0.10172	1	41	17.2187	Carboxypeptidase activity	Ace
0.10172	1	40	17.6492	Frizzled binding	Sfrp1
0.10172	1	41	17.2187	Steroid dehydrogenase activity, acting on the CH-OH group of donors, NAD or NADP as acceptor	Hsd11b1
0.10172	1	41	17.2187	Mitogen-activated protein kinase binding	Ace
0.107885	1	45	15.6882	Chemokine activity	Pf4
0.107885	1	45	15.6882	Oxidoreductase activity, acting on the aldehyde or oxo group of donors, NAD or NADP as acceptor	Aldh1a1
0.107885	2	288	4.90255	Peptide binding	Ace Cst3
0.112115	1	48	14.7077	Steroid dehydrogenase activity	Hsd11b1
0.112848	1	49	14.4075	Oxidoreductase activity, acting on paired donors, with incorporation or reduction of molecular oxygen, NAD(P)H as one donor, and incorporation of one atom of oxygen	Fmo2
0.126669	1	56	12.6066	Oxidoreductase activity, acting on the aldehyde or oxo group of donors	Aldh1a1
0.12717	1	57	12.3854	Extracellular matrix binding	Smoc2
0.130636	1	60	11.7661	Amyloid-beta binding	Cst3
0.130636	1	61	11.5732	Sulfotransferase activity	Sult1e1
0.130636	1	61	11.5732	Hydro-lyase activity	Cyp1b1
0.133073	1	63	11.2058	NAD binding	Aldh1a1
0.133808	1	65	10.861	Copper ion binding	Cp
0.133808	1	65	10.861	Metalloexopeptidase activity	Ace
0.135454	1	68	10.3819	Cysteine-type endopeptidase inhibitor activity	Cst3
0.135454	1	70	10.0853	Collagen binding	Aspn
0.135454	1	69	10.2314	Steroid hydroxylase activity	Cyp1b1
0.135454	2	365	3.86832	Amide binding	Ace Cst3
0.135454	1	68	10.3819	Molecular carrier activity	Trf
0.139389	1	73	9.67079	Chemokine receptor binding	Pf4
0.141426	1	75	9.4129	Oxidoreductase activity, acting on paired donors, with incorporation or reduction of molecular oxygen, reduced flavin or flavoprotein as one donor, and incorporation of one atom of oxygen	Cyp1b1
0.145172	1	78	9.05087	Carbon-oxygen lyase activity	Cyp1b1
0.150551	1	82	8.60936	Transferase activity, transferring sulphur-containing groups	Sult1e1
0.154069	1	85	8.3055	Antioxidant activity	Hp
0.15916	1	89	7.93222	Calcium-dependent protein binding	S100a4
0.15916	1	90	7.84409	Flavin adenine dinucleotide binding	Fmo2
0.167325	1	96	7.35383	Exopeptidase activity	Ace
0.168405	2	443	3.18721	Actin binding	S100a4 Ace
0.173268	1	102	6.92125	Cysteine-type endopeptidase activity	Sfrp1
0.173268	1	103	6.85406	Chaperone binding	Cp
0.188459	1	114	6.1927	Steroid binding	Hsd11b1
WT Female v KO Female: Over-representted pathways in WT Female
Enrichment FDR	nGenes	Pathway Genes	Fold Enrichment	Pathway	Genes
0.00227164	3	38	57.5921	Regulation of amyloid-beta formation	Igf1 Spon1 Ntrk2
0.00227164	3	19	115.184	Negative regulation of amyloid-beta formation	Igf1 Spon1 Ntrk2
0.00227164	3	22	99.4773	Negative regulation of amyloid precursor protein catabolic process	Igf1 Spon1 Ntrk2
0.00227164	3	35	62.5286	Positive regulation of vascular associated smooth muscle cell proliferation	Igf1 Adamts1 Gja1
0.00227164	7	573	8.91187	Positive regulation of cell motility	Cxcl16 Igf1 Ccl11 Has2 Adamts1 Hspa5 Ackr3
0.00227164	10	1474	4.94912	Cell migration	Cxcl16 Igf1 Ccl11 Has2 Adamts1 Tnfrsf12a Hspa5 Ackr3 Gja1 Ntrk2
0.00227164	8	747	7.81258	Vasculature development	Igf1 Ccl11 Has2 Adamts1 Tnfrsf12a Ackr3 Gja1 Ntrk2
0.00227164	7	549	9.30146	Positive regulation of cell migration	Cxcl16 Igf1 Ccl11 Has2 Adamts1 Hspa5 Ackr3
0.00227164	8	887	6.57948	Tube morphogenesis	Igf1 Ccl11 Has2 Adamts1 Tnfrsf12a Ackr3 Gja1 Ntrk2
0.00227164	7	590	8.65508	Positive regulation of locomotion	Cxcl16 Igf1 Ccl11 Has2 Adamts1 Hspa5 Ackr3
0.00227164	7	623	8.19663	Blood vessel morphogenesis	Ccl11 Has2 Adamts1 Tnfrsf12a Ackr3 Gja1 Ntrk2
0.00227164	9	1112	5.90423	Positive regulation of cellular component organization	Tppp3 Igf1 Ccl11 Adamts1 Tnfrsf12a Hspa5 Il4ra Alkal2 Ntrk2
0.00227164	7	590	8.65508	Positive regulation of cellular component movement	Cxcl16 Igf1 Ccl11 Has2 Adamts1 Hspa5 Ackr3
0.00227164	3	33	66.3182	Response to interleukin-4	Ccl11 Tuba1b Hspa5
0.00227164	9	1135	5.78458	Circulatory system development	Igf1 Ccl11 Has2 Adamts1 Tnfrsf12a Eln Ackr3 Gja1 Ntrk2
0.00267894	8	918	6.3573	Regulation of cell migration	Cxcl16 Igf1 Ccl11 Has2 Adamts1 Hspa5 Ackr3 Gja1
0.00318014	3	46	47.5761	Regulation of amyloid precursor protein catabolic process	Igf1 Spon1 Ntrk2
0.00318014	8	970	6.01649	Regulation of cell motility	Cxcl16 Igf1 Ccl11 Has2 Adamts1 Hspa5 Ackr3 Gja1
0.00318014	3	46	47.5761	Amyloid-beta formation	Igf1 Spon1 Ntrk2
0.00318014	8	966	6.04141	Regulation of cellular component biogenesis	Tppp3 Ccl11 Has2 Hspa5 Eln Cryab Gja1 Ntrk2
0.00323598	7	717	7.12204	Blood vessel development	Ccl11 Has2 Adamts1 Tnfrsf12a Ackr3 Gja1 Ntrk2
0.00323598	10	1636	4.45905	Cell motility	Cxcl16 Igf1 Ccl11 Has2 Adamts1 Tnfrsf12a Hspa5 Ackr3 Gja1 Ntrk2
0.00323598	10	1636	4.45905	Localization of cell	Cxcl16 Igf1 Ccl11 Has2 Adamts1 Tnfrsf12a Hspa5 Ackr3 Gja1 Ntrk2
0.00376276	8	1019	5.72718	Regulation of locomotion	Cxcl16 Igf1 Ccl11 Has2 Adamts1 Hspa5 Ackr3 Gja1
0.00417261	3	55	39.7909	Amyloid-beta metabolic process	Igf1 Spon1 Ntrk2
0.00452974	8	1058	5.51607	Regulation of cellular component movement	Cxcl16 Igf1 Ccl11 Has2 Adamts1 Hspa5 Ackr3 Gja1
0.00459945	3	59	37.0932	Regulation of vascular associated smooth muscle cell proliferation	Igf1 Adamts1 Gja1
0.00459945	3	59	37.0932	Vascular associated smooth muscle cell proliferation	Igf1 Adamts1 Gja1
0.00467026	3	60	36.475	Amyloid precursor protein catabolic process	Igf1 Spon1 Ntrk2
0.00498031	3	62	35.2984	Positive regulation of smooth muscle cell migration	Igf1 Has2 Adamts1
0.00518847	8	1111	5.25293	Tube development	Igf1 Ccl11 Has2 Adamts1 Tnfrsf12a Ackr3 Gja1 Ntrk2
0.00518847	5	340	10.7279	Rhythmic process	Igf1 Has2 Adamts1 Hspa5 Ntrk2
0.0053961	10	1822	4.00384	Locomotion	Cxcl16 Igf1 Ccl11 Has2 Adamts1 Tnfrsf12a Hspa5 Ackr3 Gja1 Ntrk2
0.00627582	2	12	121.583	Maintenance of protein localization in endoplasmic reticulum	Hspa5 Gja1
0.00723614	3	74	29.5743	Amyloid precursor protein metabolic process	Igf1 Spon1 Ntrk2
0.00925678	4	210	13.8952	Positive regulation of neuron projection development	Adamts1 Hspa5 Alkal2 Ntrk2
0.00926243	6	635	6.89291	Muscle structure development	Igf1 Csrp2 Eln Il4ra Cryab Gja1
0.00945545	7	922	5.5385	Response to cytokine	Cxcl16 Ccl11 Has2 Tuba1b Hspa5 Il4ra Ackr3
0.00988851	5	413	8.83172	Regulation of cell growth	Cxcl16 Igf1 Tnfrsf12a Cryab Gja1
0.00988851	5	415	8.78916	Positive regulation of cell projection organization	Adamts1 Tnfrsf12a Hspa5 Alkal2 Ntrk2
0.00988851	3	86	25.4477	Ovulation cycle	Has2 Adamts1 Hspa5
0.00988851	9	1627	4.03534	Generation of neurons	Igf1 Ccl11 Adamts1 Tnfrsf12a Hspa5 Ugdh Gja1 Alkal2 Ntrk2
0.0105175	3	90	24.3167	Vasculogenesis	Has2 Ackr3 Ntrk2
0.0106191	3	91	24.0495	Regulation of smooth muscle cell migration	Igf1 Has2 Adamts1
0.010695	7	967	5.28077	Response to lipid	Cxcl16 Igf1 Cryab Spon2 Gja1 Ntrk2 Thbd
0.0111872	5	435	8.38506	Positive regulation of MAPK cascade	Igf1 Ccl11 Ackr3 Alkal2 Ntrk2
0.0122825	5	446	8.17825	Regulation of protein-containing complex assembly	Tppp3 Ccl11 Hspa5 Eln Cryab
0.0124702	3	99	22.1061	Smooth muscle cell migration	Igf1 Has2 Adamts1
0.0124702	6	707	6.19095	MAPK cascade	Igf1 Ccl11 Cryab Ackr3 Alkal2 Ntrk2
0.01363	8	1385	4.21372	Cytoskeleton organization	Tppp3 Csrp2 Ccl11 Tuba1b Eln Cryab Gja1 Tuba1a
0.01363	7	1041	4.90538	Animal organ morphogenesis	Igf1 Ccl11 Has2 Adamts1 Eln Gja1 Ntrk2
0.01363	9	1765	3.71983	Neurogenesis	Igf1 Ccl11 Adamts1 Tnfrsf12a Hspa5 Ugdh Gja1 Alkal2 Ntrk2
0.01363	3	107	20.4533	Positive regulation of smooth muscle cell proliferation	Igf1 Adamts1 Gja1
0.01363	2	22	66.3182	Chondroitin sulfate proteoglycan biosynthetic process	Igf1 Ugdh
0.01363	8	1380	4.22899	Positive regulation of developmental process	Igf1 Ccl11 Has2 Tnfrsf12a Hspa5 Il4ra Gja1 Ntrk2
0.01363	4	254	11.4882	Heart morphogenesis	Has2 Adamts1 Eln Gja1
0.0145868	8	1405	4.15374	Regulation of multicellular organismal development	Igf1 Ccl11 Adamts1 Tnfrsf12a Hspa5 Il4ra Gja1 Ntrk2
0.0147204	3	112	19.5402	Muscle cell migration	Igf1 Has2 Adamts1
0.0147204	5	488	7.47439	Cell growth	Cxcl16 Igf1 Tnfrsf12a Cryab Gja1
0.0147204	2	24	60.7917	Chronic inflammatory response	Ccl11 Gja1
0.0163923	5	503	7.25149	Reproductive structure development	Tppp3 Igf1 Adamts1 Hspa5 Gja1
0.016868	5	508	7.18012	Reproductive system development	Tppp3 Igf1 Adamts1 Hspa5 Gja1
0.0183645	3	124	17.6492	Regulation of wound healing	Tnfrsf12a Gja1 Thbd
0.0188028	5	524	6.96088	Regulation of neuron projection development	Adamts1 Tnfrsf12a Hspa5 Alkal2 Ntrk2
0.019448	6	811	5.39704	Cellular response to cytokine stimulus	Ccl11 Has2 Tuba1b Hspa5 Il4ra Ackr3
0.0199892	2	31	47.0645	Glutamate secretion	Gja1 Ntrk2
0.0199892	3	133	16.4549	Regulation of endothelial cell proliferation	Igf1 Ccl11 Gja1
0.0199892	2	31	47.0645	Response to fluid shear stress	Has2 Gja1
0.0199892	2	30	48.6333	Decidualization	Tppp3 Gja1
0.0199892	7	1144	4.46372	Anatomical structure formation involved in morphogenesis	Csrp2 Ccl11 Adamts1 Tnfrsf12a Il4ra Ackr3 Gja1
0.0199892	8	1517	3.84707	Positive regulation of multicellular organismal process	Igf1 Ccl11 Tnfrsf12a Hspa5 Il4ra Spon2 Gja1 Ntrk2
0.0199892	5	547	6.66819	Regulation of cell development	Igf1 Ccl11 Has2 Tnfrsf12a Ntrk2
0.0199892	2	30	48.6333	Cellular response to interleukin-4	Tuba1b Hspa5
0.0199892	2	31	47.0645	Cellular response to gamma radiation	Hspa5 Cryab
0.0207984	4	316	9.23418	Regulation of ERK1 and ERK2 cascade	Igf1 Ccl11 Ackr3 Alkal2
0.0220625	2	33	44.2121	Chondroitin sulfate proteoglycan metabolic process	Igf1 Ugdh
0.023506	7	1206	4.23425	Neuron development	Adamts1 Tnfrsf12a Hspa5 Ugdh Gja1 Alkal2 Ntrk2
0.0245204	3	148	14.7872	Endothelial cell proliferation	Igf1 Ccl11 Gja1
0.0245204	4	335	8.71045	ERK1 and ERK2 cascade	Igf1 Ccl11 Ackr3 Alkal2
0.0249445	2	36	40.5278	Cellular response to amyloid-beta	Igf1 Gja1
0.0260222	2	37	39.4324	Regulation of polysaccharide biosynthetic process	Igf1 Has2
0.0261662	5	601	6.06905	Heart development	Igf1 Has2 Adamts1 Eln Gja1
0.0261662	3	155	14.1194	Response to ionizing radiation	Hspa5 Cryab Thbd
0.0261662	4	345	8.45797	Positive regulation of cell development	Igf1 Has2 Tnfrsf12a Ntrk2
0.0261662	6	903	4.84718	Positive regulation of cell differentiation	Igf1 Has2 Tnfrsf12a Il4ra Gja1 Ntrk2
0.0282901	3	161	13.5932	Regulation of response to wounding	Tnfrsf12a Gja1 Thbd
0.0282901	4	357	8.17367	Regulation of epithelial cell proliferation	Igf1 Ccl11 Has2 Gja1
0.0286005	5	618	5.9021	Microtubule cytoskeleton organization	Tppp3 Tuba1b Cryab Gja1 Tuba1a
0.0287353	6	937	4.67129	Regulation of anatomical structure morphogenesis	Ccl11 Has2 Adamts1 Tnfrsf12a Gja1 Ntrk2
0.0287353	4	364	8.01648	Response to lipopolysaccharide	Cxcl16 Spon2 Gja1 Thbd
0.0287353	2	41	35.5854	Regulation of polysaccharide metabolic process	Igf1 Has2
0.0287353	5	626	5.82668	Regulation of MAPK cascade	Igf1 Ccl11 Ackr3 Alkal2 Ntrk2
0.0287353	2	41	35.5854	Maintenance of protein localization in organelle	Hspa5 Gja1
0.0288657	2	42	34.7381	Maternal placenta development	Tppp3 Gja1
0.0292698	3	168	13.0268	Regulation of smooth muscle cell proliferation	Igf1 Adamts1 Gja1
0.0296179	2	43	33.9302	Response to amyloid-beta	Igf1 Gja1
0.0296539	3	170	12.8735	Mammary gland development	Igf1 Ccl11 Gja1
0.0304898	4	380	7.67895	Response to molecule of bacterial origin	Cxcl16 Spon2 Gja1 Thbd
0.0304898	4	377	7.74005	Wound healing	Igf1 Tnfrsf12a Gja1 Thbd
0.0304898	8	1714	3.4049	Regulation of cell population proliferation	Igf1 Ccl11 Has2 Adamts1 Il4ra Ackr3 Gja1 Ntrk2
0.0304898	3	173	12.6503	Smooth muscle cell proliferation	Igf1 Adamts1 Gja1
0.0318475	2	46	31.7174	Blood vessel remodeling	Igf1 Gja1
0.0318475	3	178	12.2949	Negative regulation of cellular amide metabolic process	Igf1 Spon1 Ntrk2
0.0326176	2	47	31.0426	Glycosaminoglycan biosynthetic process	Has2 Ugdh
0.0329703	3	182	12.0247	Positive regulation of cell growth	Cxcl16 Igf1 Tnfrsf12a
0.0329703	5	665	5.48496	Regulation of growth	Cxcl16 Igf1 Tnfrsf12a Cryab Gja1
0.0330533	2	48	30.3958	Skeletal muscle tissue regeneration	Igf1 Gja1
0.0339353	7	1362	3.74927	Cell adhesion	Igf1 Has2 Tnfrsf12a Il4ra Spon2 Spon1 Ackr3
0.0341423	6	1000	4.377	Growth	Cxcl16 Igf1 Ccl11 Tnfrsf12a Cryab Gja1
0.0348789	1	2	364.75	Epicardial cell to mesenchymal cell transition	Gja1
0.0348789	1	2	364.75	Trans-synaptic signaling by neuropeptide, modulating synaptic transmission	Ntrk2
0.0348789	5	701	5.20328	Regulation of plasma membrane bounded cell projection organization	Adamts1 Tnfrsf12a Hspa5 Alkal2 Ntrk2
0.0348789	1	2	364.75	Negative regulation of oligodendrocyte apoptotic process	Igf1
0.0348789	8	1798	3.24583	Response to oxygen-containing compound	Cxcl16 Igf1 Hspa5 Cryab Spon2 Gja1 Ntrk2 Thbd
0.0348789	1	2	364.75	Regulation of cholangiocyte apoptotic process	Igf1
0.0348789	1	2	364.75	Negative regulation of cholangiocyte apoptotic process	Igf1
0.0348789	1	2	364.75	Response to methamphetamine hydrochloride	Hspa5
0.0348789	1	2	364.75	Positive regulation of mesodermal cell differentiation	Gja1
0.0348789	2	56	26.0536	Cellular response to nerve growth factor stimulus	Hspa5 Ntrk2
0.0348789	6	1028	4.25778	Positive regulation of cell population proliferation	Igf1 Ccl11 Has2 Adamts1 Gja1 Ntrk2
0.0348789	1	2	364.75	Regulation of cell communication by chemical coupling	Gja1
0.0348789	1	2	364.75	Positive regulation of cell communication by chemical coupling	Gja1
0.0348789	6	1043	4.19655	Response to organic cyclic compound	Igf1 Hspa5 Cryab Gja1 Ntrk2 Thbd
0.0348789	3	189	11.5794	Calcium-mediated signaling	Igf1 Ackr3 Ntrk2
0.0348789	1	2	364.75	Hindbrain structural organization	Hspa5
0.0348789	1	2	364.75	Cerebellum structural organization	Hspa5
0.0348789	2	56	26.0536	Ovulation cycle process	Adamts1 Hspa5
0.0348789	7	1374	3.71652	Biological adhesion	Igf1 Has2 Tnfrsf12a Il4ra Spon2 Spon1 Ackr3
0.0348789	2	53	27.5283	Proteoglycan biosynthetic process	Igf1 Ugdh
0.0348789	5	718	5.08008	Regulation of cell projection organization	Adamts1 Tnfrsf12a Hspa5 Alkal2 Ntrk2
0.0348789	2	52	28.0577	Mast cell mediated immunity	Il4ra Spon2
0.0348789	1	2	364.75	Negative regulation of T-helper 1 cell differentiation	Il4ra
0.0348789	1	2	364.75	UDP-glucuronate metabolic process	Ugdh
0.0348789	2	56	26.0536	Lymphocyte chemotaxis	Cxcl16 Ccl11
0.0348789	4	422	6.91469	Epithelial cell proliferation	Igf1 Ccl11 Has2 Gja1
0.0348789	3	204	10.7279	Positive regulation of epithelial cell proliferation	Igf1 Ccl11 Has2
0.0348789	4	415	7.03133	Regulation of neurogenesis	Igf1 Ccl11 Tnfrsf12a Ntrk2
0.0348789	6	1032	4.24128	Negative regulation of multicellular organismal process	Igf1 Ccl11 Adamts1 Il4ra Gja1 Thbd
0.0348789	4	427	6.83372	Muscle tissue development	Igf1 Csrp2 Eln Gja1
0.0348789	1	2	364.75	Positive regulation of ERK5 cascade	Alkal2
0.0348789	1	2	364.75	Atrial ventricular junction remodeling	Gja1
0.0352802	7	1439	3.54864	Response to biotic stimulus	Cxcl16 Ccl11 Hspa5 Il4ra Spon2 Gja1 Thbd
0.0355472	6	1064	4.11372	Neuron projection development	Adamts1 Tnfrsf12a Hspa5 Gja1 Alkal2 Ntrk2
0.0357675	5	728	5.0103	Supramolecular fiber organization	Tppp3 Csrp2 Ccl11 Eln Cryab
0.0359101	2	59	24.7288	Aminoglycan biosynthetic process	Has2 Ugdh
0.0359101	2	59	24.7288	Response to nerve growth factor	Hspa5 Ntrk2
0.0359101	2	59	24.7288	Response to gamma radiation	Hspa5 Cryab
0.0359101	2	59	24.7288	Water homeostasis	Igf1 Has2
0.0371151	3	214	10.2266	Positive regulation of leukocyte cell-cell adhesion	Igf1 Has2 Il4ra
0.0376566	7	1470	3.47381	Neuron differentiation	Adamts1 Tnfrsf12a Hspa5 Ugdh Gja1 Alkal2 Ntrk2
0.0382932	2	62	23.5323	Embryo implantation	Tppp3 Gja1
0.0382932	3	218	10.039	Response to tumor necrosis factor	Cxcl16 Ccl11 Has2
0.0382932	6	1092	4.00824	Multicellular organismal reproductive process	Tppp3 Igf1 Has2 Adamts1 Hspa5 Gja1
0.038322	3	219	9.99315	Positive regulation of ERK1 and ERK2 cascade	Ccl11 Ackr3 Alkal2
0.039559	3	222	9.85811	Bone development	Igf1 Has2 Gja1
0.0400381	6	1109	3.9468	Multicellular organism reproduction	Tppp3 Igf1 Has2 Adamts1 Hspa5 Gja1
0.0402841	1	3	243.167	Trans-synaptic signaling by neuropeptide	Ntrk2
0.0402841	1	3	243.167	Regulation of oligodendrocyte apoptotic process	Igf1
0.0402841	1	3	243.167	Regulation of monocyte aggregation	Has2
0.0402841	1	3	243.167	Positive regulation of monocyte aggregation	Has2
0.0402841	1	3	243.167	Cholangiocyte apoptotic process	Igf1
[truncated: 3,624 more rows]
